1  
2  
3  
4  
5  
6  
7  
8  
9  
10  
11  
12  
13  
14  
15  
16  
17  
18  
19  
20  
21  
22  
23  
24  
25  
26  
27

**Conventional dose rate spatially-fractionated radiation therapy (SFRT) treatment  
response and its association with dosimetric parameters – A preclinical study in a Fisher  
344 rat model**

Judith N. Rivera<sup>1</sup>, Thomas M. Kierski<sup>1</sup>, Sandeep K. Kasoji<sup>1</sup>, Anthony S. Abrantes<sup>2</sup>, Paul A. Dayton<sup>1</sup>,  
Sha X. Chang<sup>1,3,\*</sup>

<sup>1</sup> Department of Biomedical Engineering, A Joint Program of the University of North Carolina-  
Chapel Hill and North Carolina State University, Chapel Hill, North Carolina, United States of  
America

<sup>2</sup> Department of Biostatistics, University of North Carolina- Chapel Hill, Chapel Hill, North Carolina,  
United States of America

<sup>3</sup> Department of Radiation Oncology, University of North Carolina- Chapel Hill, Chapel Hill, North  
Carolina, United States of America

\* Corresponding Author

Email: [sha\\_chang@med.unc.edu](mailto:sha_chang@med.unc.edu) (SXC)

## 28 Abstract

29 **Purpose:** To identify key dosimetric parameters that have close associations with tumor treatment  
30 response and body weight change in SFRT treatments with a large range of spatial-fractionation  
31 scale at dose rates of several Gy/min.

32 **Methods:** Six study arms using uniform tumor radiation, half-tumor radiation, 2mm beam array  
33 radiation, 0.3mm minibeam radiation, and an untreated arm were used. All treatments were  
34 delivered on a 320kV x-ray irradiator. Forty-two female Fischer 344 rats with fibrosarcoma tumor  
35 allografts were used. Dosimetric parameters studied are peak dose and width, valley dose and  
36 width, peak-to-valley-dose-ratio, volumetric average dose, percentage volume directly irradiated,  
37 and tumor- and normal-tissue EUD. Animal survival, tumor volume change, and body weight  
38 change (indicative of treatment toxicity) are tested for association with the dosimetric parameters  
39 using linear regression and Cox Proportional Hazards models.

40 **Results:** The dosimetric parameters most closely associated with tumor response are tumor EUD  
41 ( $R^2=0.7923$ , F-stat=15.26\*; z-test=-4.07\*\*\*), valley/minimum dose ( $R^2=0.7636$ , F-stat=12.92\*; z-  
42 test=-4.338\*\*\*), and percentage tumor directly irradiated ( $R^2=0.7153$ , F-stat=10.05\*; z-test=-  
43 3.837\*\*\*) per the linear regression and Cox Proportional Hazards models, respectively. Tumor  
44 response is linearly proportional to valley/minimum doses and tumor EUD. Average dose  
45 ( $R^2=0.2745$ , F-stat=1.514 (no sig.); z-test=-2.811\*\*) and peak dose ( $R^2=0.04472$ , F-stat=0.6874  
46 (not sig.); z-test=-0.786 (not sig.)) show the weakest associations to tumor response. Only the  
47 uniform radiation arm did not gain body weight post-radiation, indicative of treatment toxicity;  
48 however, body weight change in general shows weak association with all dosimetric parameters  
49 except for valley/min dose ( $R^2=0.3814$ , F-stat=13.56\*\*), valley width ( $R^2=0.2853$ , F-stat=8.783\*\*),  
50 and peak width ( $R^2=0.2759$ , F-stat=8.382\*\*).

51 **Conclusions:** For a single-fraction SFRT at conventional dose rates, valley, not peak, dose is  
52 closely associated with tumor treatment response and thus should be used for treatment

53 prescription. Tumor EUD, valley/min dose, and percentage tumor directly irradiated are the top  
54 three dosimetric parameters that exhibited close associations with tumor response.

55

## 56 **Introduction**

57 Spatially-fractionated radiation therapy (SFRT) is a nonconventional radiation therapy that is  
58 characterized by intentionally-created high dose inhomogeneities, ultra-high maximum doses,  
59 and single fraction treatments (1, 2). The dose inhomogeneity consists of many small sub-regions  
60 with alternating high and low doses throughout the treatment volume. SFRT includes clinical  
61 GRID therapy(1, 3) and preclinical microbeam radiation therapy (MRT) (4), each of which of has  
62 a decades-long history demonstrating its superior therapeutic ratio compared to conventional  
63 radiation therapy, especially in terms of normal organ sparing. Detailed summaries can be found  
64 in two recent reviews by Billena and Khan (5) for GRID therapy and by Eling et al. (6, 7) for MRT.  
65 Today, there are a number of modern treatment delivery technologies available for clinical SFRT  
66 including multi-leaf collimator generated GRID (8), LATTICE (9-11), Tomotherapy (5), and particle  
67 GRID therapy (12, 13). For preclinical SFRT, newer technologies include “minibeams” with larger  
68 spatial fractionation scales (on the order of millimeter instead of the tens of microns used in  
69 classical MRT) (14, 15) and with conventional dose-rates (16, 17). Most published MRT research  
70 utilized brilliant x-rays generated from synchrotron accelerator facilities with ultrahigh dose rates  
71 (4). The conventional dose rate SFRT radiations, such as the ones used in this study, are highly  
72 relevant to translational research for LINAC-based SFRT clinical applications, where conventional  
73 dose rates are also used.

74 Despite the long history and well demonstrated therapeutic ratio advantage over  
75 conventional uniform dose radiation therapy, SFRT remains an experimental therapy. There are  
76 several reasons attributed to the sluggish clinical translation progress including a lack of  
77 understanding of SFRT working mechanisms and of the association between SFRT treatment

78 response and dosimetry. While we have verified treatment dosimetry and tumor control outcome  
79 correlations for conventional radiation therapy (i.e., tumor minimum dose and EUD are closely  
80 correlated with tumor control) (18) we do not yet have such understanding for SFRT, which has  
81 significantly more complex dosimetry than that of conventional radiation therapy. Unique SFRT  
82 dosimetric parameters that describe the dosimetry include peak dose, valley dose, peak-to-valley-  
83 dose-ratio, peak width, valley width, and percentage tumor volume directly irradiated. It is  
84 reasonable to assume that not all these dosimetric parameters have the same clinical significance.  
85 To effectively advance SFRT clinical translation it is critically important to identify which  
86 parameters have strong/weak associations with a given treatment response.

87 The goal of this study is to identify key dosimetric parameters that are most closely  
88 associated with treatment response using a preclinical animal model. We hypothesize that while  
89 peak dose has always been used to prescribe SFRT treatment for both clinical and preclinical  
90 applications, peak dose may not be the dosimetric parameter most closely associated with SFRT  
91 tumor control or treatment toxicity. If it is not, which SFRT dosimetric parameters are? Further,  
92 we ask that, for a given pattern of SFRT treatment, what is its conventional radiation therapy  
93 equivalence for a given treatment response? The answers to these questions are crucial to  
94 advance clinical translation of SFRT. Unfortunately, decades of synchrotron-based MRT studies  
95 may not be able to answer these questions due to the use of ultrahigh dose rates (1000sGy/sec)  
96 (19). Recent research on FLASH radiation has shown that radiation with dose-rates of 100Gy/s  
97 or higher selectively spares normal tissue not tumor (4, 20, 21). This new finding revealed that  
98 the ultrahigh dose-rate alone is partially responsible for the observed high therapeutic-ratio  
99 demonstrated in the majority of SFRT research published so far (6). This study will help discern  
100 the impact of radiation spatial fractionation at dose rates relevant to clinical SFRT treatments.

101 Today, SFRT is receiving much deserved renewed attention and enthusiasm in the field  
102 of radiation oncology. In 2018 National Cancer Institute and Radiosurgery Society jointly held the  
103 first workshop on Understanding High-Dose, Ultra-Dose-Rate and Spatially Fractionated

104 Radiotherapy and created three standing working groups (clinical, biology, and physics) aiming  
105 to provide guidelines on SFRT research and clinical application (22). We hope this work will assist  
106 in this endeavor by shedding light on the clinical impact of SFRT dosimetry parameters.

107

## 108 **Materials and methods**

### 109 **Study design**

110 The secret of SFRT lays in its radiation dose spatial fractionation. Although this work does  
111 not address the very much needed understanding of working mechanism it addresses another  
112 important matter for SFRT application - the association of SFRT dosimetric parameters with  
113 treatment response at conventional dose rates (dose rate ranges from 4.27 to 5.25Gy/min was  
114 used). Fig 1 shows a six-arm study design using a very large span of radiation spatial fractionation,  
115 constructed to explore the impact of radiation spatial fractionation. Table 1 summarizes the  
116 dosimetric parameters of each of the six arms. To study the effect of radiation spatial fractionation  
117 under the condition of equal volume-averaged dose we used the following four study arms:  
118 20GyUniformRT (entire tumor directly irradiated), 20GyHalfRT (only one-half of tumor directly  
119 irradiated), 20Gy2mmSFRT (50% of tumor directly irradiated by 2mm-wide planar beam array),  
120 and 20GySFRT (20% of tumor directly irradiated with 0.3mm-wide planar beam array). Note that  
121 the doses are volume-averaged doses computed for the entire tumor volume. A 50GySFRT arm  
122 (50Gy volume-averaged dose, beam width 0.31mm) is added as it has a peak dose of 225Gy,  
123 which is within the known minibeam peak dose range showing tumor control. To account for  
124 unavoidable variations in tumor position under the 20Gy2mmSFRT treatment beams during  
125 animal irradiations, we computed the maximum and minimum beam coverage positions and  
126 calculated their corresponding dosimetric specifications. The 20Gy2mmSFRT treatment arm  
127 dosimetric values reported in Table 1 correspond to the average at these positions for a 10mm

128 diameter tumor. For example, a 10mm sized tumor is irradiated by at most three 2mm-peaks and  
 129 at minimum two 2mm-peaks and the average dosimetric parameter at these two positions was  
 130 calculated.

131

132 **Fig 1. Illustration of the SFRT spatial fractionation study design.**

133 A very large range of radiation spatial fractionation scale was used to derive the impact of radiation  
 134 spatial fractionation. Four arms share the same 20Gy volume-average dose. The high dose  
 135 50GySFRT arm is added because 20GySFRT is not known to have tumor control. The dosimetric  
 136 parameters studied and number of animals per study arm are listed in Table 1.  
 137

138 **Table 1. Summary of nine SFRT dosimetric parameter specifications in the six-arm study.**

| Treatment Arm            | # of Animals | Vol-Avg Dose <sup>a</sup> (Gy) | Peak Surface Dose (Gy) | Valley Surface Dose (Gy) | EUD (T <sup>a</sup> /N <sup>e</sup> ) | PVDR | Valley Width (mm) | Peak Width (mm) | % Volume Irradiated     |
|--------------------------|--------------|--------------------------------|------------------------|--------------------------|---------------------------------------|------|-------------------|-----------------|-------------------------|
| Untreated                | 8            | 0                              | 0                      | 0                        | 0                                     | N/A  | 0                 | 0               | 0                       |
| 20GyUniformRT            | 8            | 20                             | 20.8                   | 20.8                     | 19.9/20.1                             | 1    | 20                | 20              | 100                     |
| 20GyHalf-SFRT            | 5            | 20                             | 39                     | 3.1                      | 2.9/30.5                              | 12.6 | 10                | 10              | 47.8(±2.2) <sup>d</sup> |
| 20Gy2mmSFRT <sup>c</sup> | 6            | 17.6 <sup>b</sup>              | 34.5                   | 6.2                      | 5.2/25.1                              | 5.6  | 2                 | 2.2             | 51.5(±11.6)             |
| 20GySFRT                 | 9            | 20                             | 91                     | 6.8                      | 5.3/47.4                              | 13.3 | 0.9               | 0.31            | 20.3                    |
| 50GySFRT                 | 6            | 50                             | 225                    | 16.8                     | 13.1/117.3                            |      |                   |                 |                         |

139 <sup>a</sup>: Computed within 1cm depth (the tumor depth).

140 <sup>b</sup>: 17.63Gy instead of the intended 20Gy was used.

141 <sup>c</sup>: Dosimetric parameters for the 20Gy2mmSFRT arm were computed considering the maximum  
 142 range of possible tumor positioning under the collimator.

143 <sup>d</sup>: Percentage volume irradiated for the 20GyHalfSFRT arm was computed using treatment  
 144 verification film analysis of the irradiated tumors.

145 <sup>e</sup>: T/N in the table denotes Tumor EUD and normal tissue EUD. Tumor EUD is computed using  
 146 a= -10 and a tumor size of 1cm in diameter. Normal tissue EUD is computed using a=5 and a

147 volume of 2cm in diameter. Note that tumor EUD is lower than valley surface dose is because the  
148 valley dose is measured at the surface while EUDs are computed using volumetric dose.

149 Custom-made radiation blocks and collimators made of Cerrobend or tungsten were used  
150 to define the 2cmx2cm field for 20GyUniformRT arm treatment, the 2cmx1cm for 20GyHalfSFRT  
151 treatment, and the beamlet array 2cmx2cm fields for both the 20Gy2mmSFRT and  
152 20Gy/50GySFRT treatments. The 2cm field size in the direction of the uniform dose within each  
153 of SFRT planar beams is made possible by the very large focal spot size (8mm<sup>2</sup>) of the XRad  
154 irradiator (Precision X-ray Inc., North Branford, CT USA). All irradiations in this study used the  
155 same irradiator.

## 156 **Animal tumor model**

157 This study was carried out in strict accordance with the recommendations in the Guide for  
158 the Care and Use of Laboratory Animals of the National Institutes of Health (NIH). The University  
159 of North Carolina- Chapel Hill Institutional Animal Care and Use Committee (IACUC) reviewed  
160 and approved the animal protocol (IACUC ID: 15-366.0) in accordance with NIH standards. All  
161 animal surgical, radiation, and imaging procedures were performed under general anesthesia and  
162 all efforts were made to minimize suffering.

163 Forty-two eight-week-old female Fischer 344 rats from Charles River Labs and rat  
164 fibrosarcoma tumor allografts were used (23). The rat fibrosarcoma (FSA) allograft model has  
165 been well characterized in several radiotherapy response studies by our and collaborator labs  
166 (23-25). Rat FSA is characterized as a local, non-metastasizing tumor that is highly vascular and  
167 oxygen dependent (34,35). It is an appropriate tumor model for our long-term study goal that  
168 investigates the association of SFRT dosimetric parameters with treatment responses, which is  
169 reported here, and the association between SFRT treatment response and tumor vascular change  
170 post radiation using 3D acoustic angiography. The latter is ongoing research for future publication.

171 All surgical, radiation, and imaging procedures were performed under general anesthesia,  
172 induced in the animals initially using 5% vaporized isoflurane mixed with pure oxygen as the  
173 carrier gas and then maintained at 2.5% isoflurane mixed with pure oxygen throughout each  
174 procedure. Depth of anesthesia was monitored by toe pinch reflex and breathing rate. Ophthalmic  
175 ointment was placed on the animal's eyes during anesthesia to provide lubrication and body  
176 temperature under anesthesia was maintained via electronically controlled heating pad. Tumors  
177 were grown in each rat by implanting freshly resected tumor tissue (1mm<sup>3</sup>) that was harvested  
178 from tumor-bearing donor rats into the subcutaneous space of the rodent flank using blunt  
179 dissection. Postoperative care included daily incision surveillance, body temperature monitoring,  
180 and a water bottle containing 6mg/mL cherry-flavored, dye-free children's Tylenol diluted in water  
181 for a minimum of 24-hrs post-surgery to alleviate any associated pain from the implantation  
182 procedure. Animals were used for experiments 2-3 weeks post-implantation, when the tumors  
183 reached the target RT treatment size of approximately 5-10mm.

184 In preclinical studies the pre-treatment tumor volume is known to be strongly correlated  
185 with treatment tumor control (23). We minimize this unwanted effect by controlling the pre-  
186 treatment tumor volume in a randomized, matched group study design. We binned animals  
187 according to their pre-treatment tumor volume and then randomly assigned these matched bins  
188 of animals such that at least one animal from each bin is assigned to each treatment group. This  
189 technique resulted in an average initial tumor volume across groups of 566 +/- 47 mm<sup>3</sup> on RT  
190 treatment day. Biological variability was minimized by ordering animals from the same vendor  
191 and of the same age (6 weeks old), implanting tumor on the same day and from the same donor  
192 animal, treating with radiation on the same day, and housing animals in the same Vivarium  
193 location with identical husbandry conditions. All animals (mixed caged) were provided identical  
194 standard laboratory rodent diets of (23%> crude protein) and water ad libitum throughout the  
195 study. In addition, all animal diets were supplemented with high-calorie, nutritionally fortified



196 water-based gel cups to help mitigate any potential significant weight loss and dehydration post-  
197 radiation.

198 The animals body weight and tumor volumes are monitored prior to radiation and every  
199 third day thereafter for up to 30 days. Study endpoints are maximum tumor burden (2.5cm or  
200 larger in any dimension), weight loss in excess of 15%, body condition scores (26) less than or  
201 equal to 2, or other signs of pain, discomfort, or moribundity as recommended by University of  
202 North Carolina- Chapel Hill Division of Comparative Medicine veterinary staff. Animals that met  
203 study end-point criteria will be ethically euthanized primarily via compressed carbon dioxide gas  
204 or vaporized isoflurane overdose followed by thoracotomy as a secondary means of physical  
205 euthanasia per the approved animal study protocol.

## 206 **Animal radiation dosimetry**

207 XRad Irradiator and 320kV x-rays were used in this study. Surface dose rates ranging  
208 from 4.27 to 5.25Gy/min were used for all study arms. Fig 2 shows the treatment setup, the  
209 radiation light field on animal seen by the camera, and treatment verification films. Dosimetry was  
210 measured via EBT-3 film calibrated by an ADCL-calibrated ion chamber under large field  
211 conditions. Acrylic phantom measurement setup and beam profile and percentage depth dose  
212 (PDD) dosimetry are shown in Figs 3 and 4. The volume-averaged tumor dose was approximated  
213 by computing the film average dose within an area of 1cm by 1cm (depth) of the PDD film. The  
214 differential dose volume histograms of the PDD films were used for tumor and normal tissue EUD  
215 calculations as described by Niemierko (27) using values of  $a=-10$  for tumor and  $a=5$  for normal  
216 tissue.

217

### 218 **Fig 2. Animal irradiation setup and treatment alignment and verification.**

219 (A - B) The treatment setup components include (1) X-ray source, (2) endoscopic camera (lens  
220 shielded), (3) field shaping collimator for all treated arms (20GySFRT shown), (4) animal and  
221 tumor, and the (5) 3-axial heated animal positioning stage. (C) Photo of the built-in irradiator light  
222 shines through the 50GySFRT collimator and onto the outlined tumor as seen from the beams-  
223 eye view camera (live feed used to position tumor within the treatment fields.) (D) EBT-3

224 treatment verification films with a cutout in the tumor region. The films were reviewed for all treated  
225 animals for treatment targeting verification.

226

### 227 **Fig 3. Phantom dosimetry measurement.**

228 EBT-3 films were calibrated by ion chamber under large field conditions. All beam profiles and  
229 corresponding percentage depth dose were measured using two films as shown: one is on the  
230 surface perpendicular to radiation beam (A) and one sandwiched between two small phantom  
231 blocks parallel to radiation beam (B). The circles indicate the film areas used for volume-average  
232 dose calculation estimates. The following assumption was made for volume-averaged tumor  
233 dose and EUD calculations: dose value does not vary +/-1cm along the direction parallel to the  
234 same valleys/peaks.

235

### 236 **Fig 4. Measured dose beam profiles and percentage depth doses for all treatment arms.**

237 (A-D) Figures display the percentage depth doses for each of the 20Gy volume-averaged  
238 treatment arms. (E-H) Figures display the corresponding SFRT beam profiles for each of the  
239 20Gy volume-averaged treatment arms. Note that the 20GySFRT and 50GySFRT arms share  
240 the same SFRT collimator and thus the same relative dosimetry. The large non-uniformity of the  
241 peak doses in the SFRT radiation is due to the finite x-ray target size and the nondivergence of  
242 the SFRT collimator. However, the actual peak dose non-uniformity in the treated tumor (diameter  
243 of ~10mm) is within 10%.

244

## 245 **Animal radiation delivery and verification**

246 All of the RT collimators were aligned with x-ray target of the irradiator using film dosimetry.

247 Animals were anesthetized with vaporized isoflurane mixed with oxygen carrier gas and

248 positioned on an electronically controlled heating pad (Fig 2, panels A and B). For radiation tumor

249 targeting we used the light field and a PC-linked camera before radiation and verified it with film

250 dosimetry during each irradiation (Fig 2, panel C). Live video-feed from the camera was used for

251 animal tumor-radiation alignment and for animal monitoring during treatment. Radiation targeting

252 is achieved by (a) delineating the tumor boundary on animal skin using marker pre-treatment, (b)

253 transferring the marking onto the verification EBT-3 film taped on skin and cutting out the tumor

254 portion of the film, (c) taping the film back with the tumor inside the cutout, (d) placing the animal

255 in the irradiator and align the tumor with the radiation, and (e) animal monitoring throughout

256 irradiation. The treatment verification films were reviewed post-radiation for radiation targeting

257 documentation (Fig 2, panel D).

## 258 **Tumor volume imaging and body weight monitoring**

259 Three-dimensional B-mode ultrasound imaging of the tumors was performed using a Vevo  
260 770 preclinical ultrasound scanner (Vevo 770, VisualSonics, Toronto, ON, Canada) and the  
261 resulting images used to calculate tumor volume, as described in a previous publication (23).  
262 Imaging was performed on the day before treatment as well as every third day post-treatment for  
263 approximately 30 days, or when maximal tumor burden was met, at which point the animals were  
264 humanely sacrificed per IACUC-approved animal protocol. Fig 5 shows an illustration of the 3D  
265 ultrasound tumor imaging setup and acquisition. Three-dimensional imaging is performed by  
266 mechanically stepping the ultrasound probe in the elevational dimension and acquired a two-  
267 dimensional image at each step (100um step size, 2cm elevational scan length). The  
268 reconstructed 3D ultrasound images were used to calculate tumor volume. The longest  
269 orthogonal tumor dimensions in each 3D image were measured using the digital caliper feature  
270 on the Vevo 770 imaging software and tumor volume was approximated using the volume formula  
271 for an ellipsoid,  $V = \frac{4}{3}\pi a b c$ , where  $V$  is the calculated tumor volume, and  $a$ ,  $b$ , and  $c$  are each the  
272 half lengths of the principal axes of the tumor (28). A sample tumor volume change post radiation  
273 from a 20GyHalfSFRT arm animal shows no tumor control (Fig 5, panel D). Animal body weight  
274 was measured using the same schedule.

275

### 276 **Fig 5. Illustration of 3D ultrasound imaging-based tumor volume measurement.**

277 Figure (A) is an illustration of the 3D ultrasound imaging setup with anesthetized animal (23).  
278 Two-dimensional transverse image slices (B) are acquired along the elevational direction and are  
279 then reconstructed into 3D images (29) (C). Tumors are visually identified on the ultrasound  
280 images. Resulting 3D images (C) are used to measure the tumor dimensions and calculate tumor  
281 volume. Imaging data is acquired pre-treatment (D) and every ~third day thereafter (E-G). In  
282 images D-G the tumor (yellow dotted line) and corresponding tumor volume grow over time  
283 following a 20GyHalfSFRT treatment.

284

## 285 **Association between SFRT dosimetry and treatment response**

286 We analyzed the associations between animal treatment responses and each of the nine  
287 dosimetric parameters, listed in Table 1. The treatment responses are time-to-euthanasia,

288 proportion of animals surviving to Day 17, and change in animal body weight on Day 17. We  
289 deem animal survival is a better indicator of tumor treatment response than tumor size change in  
290 this study. When tumors reach the maximum tumor mass, defined by the IACUC-approved  
291 animal protocol, ethical euthanasia is performed. As a result, animal numbers in different study  
292 arms decrease at different rates, which can introduce biases due to unbalanced sample sizes in  
293 the study. Hence, Day 17 was chosen for the linear regression association studies because at  
294 this timepoint there is a good compromise between the number of animals available for statistical  
295 consideration and the magnitude of radiation effects. We also fit a more robust Cox Proportional  
296 Hazards (CoxPH) model to the full data set that includes all animals.

297 Animal body weight change on Day 17 is used as an indicator of treatment toxicity. Animal  
298 body weight change is a gross assessment on treatment toxicity, especially in this study where  
299 tumors were implanted in the rodent flank, near the lower gastro-intestinal tract (including the  
300 rodent anus, rectum, colon, and cecum) and parts of the upper gastro-intestinal tract (including  
301 portions of the small bowel). We speculate that some treatment arms may induce more GI toxicity  
302 than others. We subtracted the tumor weight from the measured body weight and regard this “net”  
303 animal body weight change as an indication, not confirmation, of treatment toxicity. To confirm  
304 any lower GI toxicity, additional tissue histological staining or organ function examination studies  
305 would be necessary, both of which are beyond the scope of this work.

## 306 **Statistical methods**

307 We computed Product-Limit (Kaplan-Meier) Estimator and Logrank (Mantel-Haenszel)  
308 test for statistical significance of survival difference between each pair of treatment arms (30).  
309 Multiple simple linear regression models (31) were used to study the association between  
310 dosimetric parameters with animal body weight and percentage survival within treatment group  
311 on Day 17.  $R^2$  (square of the Pearson correlation) coefficient is computed to estimate the  
312 proportion of variance explained in each of the linear regression models. In general, the greater

313 the magnitude of the test statistic (t or F), the more closely associated the dosimetric parameter  
314 studied is with the treatment response (survival or body weight).

315 In addition to linear regressions, we fit Cox Proportional Hazard (CoxPH) models with  
316 individual animal survival as the time-to-event outcome, which used data from all dates including  
317 Day 17. This allowed us to calculate the hazard ratio associated with the impact of dosimetric  
318 parameters on treatment response. We also used a Pearson Correlation matrix to show the cross-  
319 correlation between each pair of the dosimetric parameters. All data collected were analyzed  
320 using R (version 3.5.3) statistical software available from R Core Team.

## 321 **Results**

### 322 **Overall treatment response**

323 Fig 6 shows (A) animal survival, (B) normalized tumor volume, and (C) normalized body  
324 weight post treatment for all 6 study arms. In this study no animal died of body condition  
325 deterioration. All endpoints were due to ethical animal euthanasia triggered by tumors exceeding  
326 the maximum allowable burden per IACUC-approved animal protocol limitations. Our data shows  
327 that the 20GyUniformRT arm has the best tumor control followed by the 50GySFRT and  
328 20Gy2mmSFRT arms. Note that among the four arms sharing similar volume-averaged dose  
329 (20Gy or 18Gy) survival varies greatly, from 33% to 100% on Day 17, which is a strong indication  
330 that volume-averaged dose is poorly associated with tumor treatment response. The tumor  
331 volume data indicate that although 50GySFRT arm and 20Gy2mmSFRT arm have similar survival  
332 the former has a better tumor volume reduction than the latter arm. Only the 20GyUniformRT  
333 arm experienced weight loss post-treatment and then recovered back to pre-treatment weight  
334 after week three. The 20GySFRT and 20Gy2mmSFRT arms experienced similar body weight  
335 gains as the untreated arm, indicating little treatment toxicity from the two SFRT treatments.

336

337 **Fig 6. Animal survival, tumor volume change, and body weight change post-treatment**

338 Animal survival (A), normalized tumor volume (B), and normalized body weight (C) are shown for  
339 all six study arms. The differences between survival curve pairs are significant ( $p < 0.05$ ) for  
340 20GyUniformRT-50GySFRT, 20GyUniformRT-20GyHalfSFRT, 20GyUniformRT-  
341 20Gy2mmSFRT, 20GyUniformRT-Untreated, 20GyUniformRT-20GySFRT, Untreated-  
342 20GySFRT, Untreated-20Gy2mmSFRT, Untreated-50GySFRT, and Untreated-20GySFRT, and  
343 moderately significant ( $0.1 > p < 0.05$ ) for 20GyHalfSFRT-50GySFRT, 20Gy2mmSFRT-50GySFRT,  
344 and 20GySFRT-50GySFRT.  
345

## 346 **Association between tumor response and SFRT dosimetry**

347 We associated eight dosimetric parameters with percentage of animals surviving to Day  
348 17 and with the survival curves shown in Fig 6. Fig 7 shows scatter plots of eight tumor-related  
349 dosimetric parameters vs. percentage survival at Day 17, each fitted with a corresponding  
350 regression line,  $R^2$  (Fig 7). Tumor EUD ( $R^2=0.7923$ ,  $F\text{-stat}=15.26^*$ ), Valley dose ( $R^2=0.7636$ ,  $F\text{-}$   
351  $\text{stat}=12.92^*$ ), and percentage volume directly irradiated ( $R^2=0.7153$ ,  $F\text{-stat}=10.05^*$ ) are the top  
352 three most statistically significant dosimetric parameters in terms of association with the animal  
353 survival at Day 17 ( see Table S1). Peak dose ( $R^2=0.04472$ ,  $F\text{-stat}=0.6874$  (not sig.)) and AVG  
354 Dose ( $R^2 = 0.2745$ ,  $F\text{-stat}=1.514$  (not sig.)) showed little association with survival.

355

356 **Fig 7. Associations between Percentage Survival (Day 17) and eight dosimetric**  
357 **parameters.**  
358 Tumor EUD (A), valley dose (B), percentage volume irradiated (C), valley width (D), peak width  
359 (E), volume-averaged dose (F), peak dose (G), and PVDR (H) vs survival (%) at Day 17 are  
360 presented as well as their corresponding regression lines and  $R^2$  values. Eight linear regression  
361 models with single covariates, one for each dosimetric parameter, were used to calculate the  $R^2$   
362 value and corresponding statistics.  
363

364 To validate the above finding in Fig 7 we used data from the entire survival curves in  
365 Univariate Cox Proportional Hazards analysis and the results are shown in Table 2. The results  
366 from the Univariate Cox Proportional Hazards analysis confirms the results from the linear  
367 regression analysis - among the eight dosimetric parameters analyzed tumor EUD ( $z\text{-stat}=-$   
368  $4.07^{***}$ ), valley/min dose ( $z\text{-stat}=-4.338^{***}$ ), and percentage tumor volume directly irradiated ( $z\text{-}$   
369  $\text{stat}=-3.837^{***}$ ) have the closest associations with animal survival. Compared to the linear

370 regression analysis (Fig 7) the improved p-values in the CoxPH model analysis is likely due to  
371 the increased sample size. The Hazard Ratio shows the impact of change in each of the  
372 dosimetric parameters to the hazard rate (risk of death). For instance, when valley/min dose  
373 parameter changes by 1 Gy, the hazard rate (risk of death) changes by 19% (95% CI, 26% - 11%)  
374 with p-value of  $1.44 \times 10^{-5}$ . For a 1Gy change in peak dose, the corresponding change in hazard  
375 rate is 0.2% (95% CI, 0.7% - 0.3%) with p-value of 0.432. Three additional statistical tests were  
376 used to validate the CoxPH z-test statistics results for each model (Likelihood Ratio Test, Wald  
377 Test, and Logrank Test) and all three tests largely agree with the results presented in Table 2.  
378

379 **Table 2: Table of coefficients for univariate Cox Proportional Hazards analysis of survival.**

| Dosimetric Parameter   | Estimate (StdErr)                                 | Hazard Ratio [95% CI] | Test Stat (z) | P value               |
|------------------------|---------------------------------------------------|-----------------------|---------------|-----------------------|
| Valley Dose            | -0.20947(0.04828)                                 | 0.81 [0.74 0.89]      | -4.338***     | $1.44 \times 10^{-5}$ |
| Tumor EUD <sup>a</sup> | -0.2650 (0.06511)                                 | 0.77 [0.68 0.87]      | -4.07***      | $4.7 \times 10^{-5}$  |
| % Vol. Irradiated      | -0.04089 (0.01066)                                | 0.96 [0.94 0.98]      | -3.837***     | $1.25 \times 10^{-4}$ |
| PVDR                   | 0.1835 (0.06016)                                  | 1.20 [1.07 1.35]      | 3.05**        | $2.29 \times 10^{-3}$ |
| Peak Width             | -0.1227 (0.0406)                                  | 0.88 [0.82 0.96]      | -3.024**      | $2.5 \times 10^{-3}$  |
| Valley Width           | -0.1312 (0.04366)                                 | 0.88 [0.81 0.96]      | -3.005**      | $2.65 \times 10^{-3}$ |
| AVG Dose               | -0.0687 (0.02444)                                 | 0.93 [0.89 0.98]      | -2.811**      | $4.91 \times 10^{-3}$ |
| Peak Dose              | $-2.150 \times 10^{-3}$ ( $2.74 \times 10^{-3}$ ) | 0.998 [0.993 1.003]   | -0.786        | 0.432                 |

380 \* significant at  $p < 0.05$

381 \*\* significant at  $p < 0.01$

382 \*\*\* significant at  $p < 0.001$

383 <sup>a</sup>: Tumor tissue equivalent uniform dose calculated using  $a = -10$ .

384

385 **Association between body weight change and SFRT**  
386 **dosimetry**



387           Eight dosimetric parameters are associated with the body weight change on Day-17.  
388       Note that the body weight is the measured body weight subtracted the measured tumor weight to  
389       remove the influence of tumor size on the analysis. Fig 8 is a scatter plot of the dosimetric  
390       parameters vs. the “net” body weight at Day 17. This time point was chosen for both the tumor  
391       and body weight study because it is a good compromise between data statistics and magnitude  
392       of treatment response. Table 3 is a table of coefficients for the corresponding linear regression  
393       models used in Fig 8. In general, the greater the magnitude of the t statistic, the greater the  
394       individual parameter association with Body Weight (Day 17). For the F-statistic, the greater the  
395       statistic value, the more closely associated the model is with Body Weight (Day 17). Based on  
396       the t statistics and F-statistics, among the eight dosimetric parameters studied the Valley Dose  
397       has the greatest, yet modest, association with Body Weight (Day 17). The order of decreasing  
398       association with the body weight change are: valley dose ( $R^2=0.3814$ ,  $F\text{-stat}=13.45^{**}$ ), valley  
399       width ( $R^2=0.2853$ ,  $F\text{-stat}=8.783^*$ ), peak width ( $R^2=0.2759$ ,  $F\text{-stat}=8.382^*$ ), percentage volume  
400       irradiated ( $R^2=0.1985$ ,  $F\text{-stat}=5.448^*$ ), PVDR ( $R^2=0.1203$ ,  $F\text{-stat}=3.009$  (not sig.)), volume-  
401       averaged dose ( $R^2=0.03308$ ,  $F\text{-stat}=0.7526$  (not sig.)), normal tissue EUD ( $R^2=1.022 \times 10^{-03}$ ,  $F\text{-}$   
402        $\text{stat}=0.882$  (not sig.)), and peak dose ( $R^2=5.99 \times 10^{-06}$ ,  $F\text{-stat}=1.32 \times 10^{-04}$  (not sig.)). A strong  
403       similarity between the peak width and valley width association with body weight is expected (see  
404       discussion in 4E section). No significant association is observed between body weight change  
405       post radiation and PVDR, average dose, normal tissue EUD, and peak dose.

406

407       **Fig 8. Associations between Body Weight (Day 17) and eight dosimetric parameters.**  
408       Scatter plots of each of the 8 treatment dosimetric parameters: valley dose (A), valley width (B),  
409       peak width (C), percentage volume irradiated (D), normal tissue EUD (E), PVDR (F), volume-  
410       averaged dose (G), and peak dose (H) vs % Body Weight at Day 17 and their corresponding  
411       regression lines and  $R^2$  values are shown. Eight linear regression models with single covariates,  
412       one for each dosimetric parameter, were used to calculate the  $R^2$  value and corresponding  
413       statistics.  
414



415 **Table 3: Table of coefficients for univariate linear regression analysis of Body Weight (Day**  
416 **17)**

| Dosimetric Parameter    | Estimate (StdErr)                                   | R <sup>2</sup>          | t value  | F-statistic            |
|-------------------------|-----------------------------------------------------|-------------------------|----------|------------------------|
| Valley Dose             | -6.306x10 <sup>-03</sup> (1.713x10 <sup>-03</sup> ) | 0.3814                  | -3.683** | 13.56**                |
| Valley Width            | -4.498x10 <sup>-03</sup> (1.518x10 <sup>-03</sup> ) | 0.2853                  | -2.964** | 8.783**                |
| Peak Width              | -4.333x10 <sup>-03</sup> (1.497x10 <sup>-03</sup> ) | 0.2759                  | -2.895** | 8.382**                |
| %Vol. Irradiated        | -9.519x10 <sup>-04</sup> (4.08x10 <sup>-04</sup> )  | 0.1985                  | -2.334*  | 5.448*                 |
| PVDR                    | 4.525x10 <sup>-03</sup> (2.609x10 <sup>-03</sup> )  | 0.1203                  | 1.735    | 3.009                  |
| AVG Dose                | -1.054x10 <sup>-03</sup> (1.215x10 <sup>-03</sup> ) | 0.03308                 | -0.867   | 0.7526                 |
| Tissue EUD <sup>a</sup> | -6.184x10 <sup>-05</sup> (4.123x10 <sup>-04</sup> ) | 1.022x10 <sup>-03</sup> | -0.15    | 0.882                  |
| Peak Dose               | -2.252x10 <sup>-06</sup> (1.961x10 <sup>-04</sup> ) | 5.99x10 <sup>-06</sup>  | -0.011   | 1.32x10 <sup>-04</sup> |

417 \* significant at p<0.05

418 \*\* significant at p<0.01

419 <sup>a</sup>: Normal tissue equivalent uniform dose calculated using a=5.

420

## 421 Discussion

### 422 Study limitations

423 There are several limitations in this study, many of which are discussed below. (i) There was  
424 no image-guidance used in the irradiation study. Our remedy for the lack of online imaging  
425 technology included the use of light field and video-based animal alignment, of treatment  
426 verification film, and lastly, removal of treatment-misaligned animals from the study. This was  
427 judged from reviewing the treatment verification film for each animal. Our remedy worked well  
428 resulting in a 20GyHalfRT arm % volume irradiated of 47.8.8% (±2.2) near the target value of  
429 50% (S1 Fig1) (ii) No CT-based treatment planning. Based on the anatomical location of the  
430 implanted tumor (rodent flank) we believe a portion of the rodent GI tract may have been irradiated

431 but the actual volume irradiated is unknown. Because all animals were randomized across study  
432 arms such that all arms have the same average pre-treatment tumor size and similar tumor  
433 location distribution, it is reasonable to assume that any variations in portions of GI track irradiated  
434 do not bias any particular study arm. (iii) Only a single tumor model used. The FSA rat tumor  
435 model does not represent tumors with low vascularity, which may have different treatment  
436 responses. The study should be repeated using different tumor and animal models. (iv) The  
437 dosimetric parameters have strong cross correlations in this study, which is discussed in more  
438 detail at the end of this section.

439 The potential impact of spatial fractionation pattern (lines vs. dots, for instance) on treatment  
440 response is beyond the scope of this work. However, it is a very important question that deserves  
441 methodical investigations as some spatial fractionation patterns are easier to achieve than others  
442 in practical application. Our data shows that valley/minimum dose has the closest association  
443 with treatment response for tumor and body weight. However, different spatial fractionation  
444 patterns with the same valley dose may not lead to the same treatment response when a different  
445 endpoint is used. In our study the 20Gy2mmSFRT arm and the 20GySFRT arm have similar  
446 valley doses but dissimilar survival fraction on Day 17. To investigate the impact of radiation  
447 spatial fractionation pattern alone on given treatment responses, carefully designed new studies  
448 are needed.

449 The exciting noncytotoxic effects of SFRT, such as induction therapy to sensitize tumor to  
450 increase therapeutic ratio of the following therapy including anti-tumor immunotherapy, remain  
451 largely underexplored (32); however, they are also beyond of the scope of this work. Our own  
452 and others' work have demonstrated that SFRT radiation impacts tumor microenvironment and  
453 modulates immune system very differently than uniform radiation therapy (33-35). We intend to  
454 conduct similar studies to identify associations between dosimetric parameters and these indirect  
455 effects of SFRT in the future.

456

## 457 **SFRT dosimetric association with treatment tumor response**

### 458 **Valley dose and tumor EUD**

459 The importance of tumor minimum dose to tumor control has long been established in  
460 conventional radiation therapy (36). Does the same association between tumor control and  
461 minimum/valley dose hold for SFRT? For some the answer is yes and sophisticated techniques  
462 have been developed to “fill up” the dose valleys in an MRT beam by interlacing the microbeams  
463 from MRT from different irradiation angles. As a result, a uniform dose distribution inside the  
464 tumor is reached (37) while the surrounding normal tissue out of the “cross-firing” range still  
465 receive largely MRT radiation pattern of peaks and valleys. In a synchrotron-MRT study Ibahim  
466 et al. (38) reported that valley dose is closely correlated with cell survival, but valley dose alone  
467 does not determine the observed radiobiological effects. Our study shows that the tumor EUD  
468 ( $a=-10$ ) and minimum/valley tumor dose have the highest linear associations ( $R^2=0.7923$ , F-  
469  $stat=15.26^*$ ;  $R^2=0.7636$ , F- $stat=12.92^*$ , respectively) with tumor treatment response (Fig 7 and  
470 S1 Table). This observed association between tumor treatment response with tumor  
471 valley/minimum dose and tumor EUD dose in this preclinical study is consistent with their known  
472 association in tumor treatment response seen in clinical conventional uniform dose radiation  
473 therapy.

474 Our data suggests that valley/minimum dose or Tumor EUD are more appropriate than  
475 peak dose for SFRT treatment prescription. When tumor control is the endpoint, we suggest that  
476 equal valley or minimum dose be used for comparative study between a uniform radiation and  
477 SFRT therapy or among different SFRT treatments.

478

### 479 **PVDR**

480 Our data showed that PVDR has a consistent but not statistically significant association  
481 with tumor treatment response ( $R^2=0.7194$ ,  $F\text{-stat}=7.691$ ) (Fig 7, S1 Table). The linear regression  
482 analysis on day 17 was not statistically significant. The CoxPH analysis using the entire survival  
483 data set show a modest association with survival. Although not statistically significant, an inverse  
484 association is observed between PVDR value and survival fraction on Day 17 - the higher PVDR  
485 value the less survival fraction. The inverse association is largely determined by the uniform  
486 radiation arm where PVDR value is 1.0. If this data point is removed, the PVDR association with  
487 survival for all SFRT arms is inconclusive (Fig. 7). We believe this result of inverse association  
488 is likely biased by the study design that has very limited PVDR values (4 values) and strong cross-  
489 correlations between PVDR and other SFRT parameters (see more discussion later in the  
490 section). A better understanding of PVDR's association with a given treatment response requires  
491 a carefully designed new study that focuses on the impact of PVDR value on treatment response.

## 492 **Percentage volume irradiated, peak width, and valley width**

493 It seems logical that tumor treatment response is closely associated with the tumor volume  
494 irradiated. However, this is not supported by a clinical GRID therapy study by Neuner et al. (2)  
495 where both MLC-based and collimator-based GRID treatments showed similar response rates for  
496 pain, mass effect, other patient complaints, and have similar adverse reactions. The collimator-  
497 generated GRID had 50% of the radiation field open while the MLC-generated GRID had only  
498 31% open. In our study the 20GyHalfSFRT and 20Gy2mmSFRT arms have similar percentage-  
499 volume-irradiated (as well as PDD curves) but there is a difference of 5 days in the 50% survival  
500 time (Fig 1 and Fig 6). Nonetheless, our data shows that percentage-volume-irradiated has the  
501 3rd highest linear association ( $R^2 = 0.7153$ ,  $F\text{-stat}=10.05^*$ ) with tumor treatment response (Fig 7  
502 and Table 2). Since percentage-volume-irradiated is jointly determined by peak width and valley  
503 width it is understandable to see moderate associations between tumor treatment response and  
504 peak width ( $R^2=0.4201$ ,  $F\text{-stat}=2.898$  (not sig.)) and valley width ( $R^2=0.4296$ ,  $F\text{-stat}=3.012$  (not

505 sig.)). In a synchrotron microbeam brain study using multiple beams Serduc et al. kept valley  
506 dose constant while varying peak width and peak dose. They concluded that the latter two  
507 parameters have strong influence therapeutic ratio (39).

## 508 **Volume-averaged dose and peak dose**

509 This study is designed to scrutinize the association of volume-averaged dose with tumor  
510 treatment response (Fig 1). The four study arms sharing very similar volume-averaged doses (20  
511 or 18 Gy) exhibited very different tumor treatment responses (Fig 6 and 7) showing the survival  
512 rate at day 17 varied from 100% to 33%. Therefore, the association between volume-average  
513 dose and tumor treatment response is weak.

514 We found that peak dose has little to no association with tumor treatment response  
515 ( $R^2=0.04472$ , F-stat=0.6874 (not sig.)) (Fig 7, S1 Table, Table 2). This finding is significant  
516 because peak dose has been used for treatment prescription in practically all SFRT treatments  
517 (8) (9). Although the linear regression analysis on day 17 showed a weak association between  
518 peak dose and survival that was not statistically significant, the CoxPH analysis using the entire  
519 survival data set did show a modest association with survival.

## 520 **SFRT dosimetric association with normal tissue toxicity**

521 We did not study treatment induced normal tissue toxicity directly in this study. We used  
522 body weight change post radiation (targeted to the flank, lower abdominal region of the animal)  
523 as an indicator, not an evidence of normal tissue toxicity. We did not see a strong association  
524 between animal body weight change and any of the eight dosimetric parameters studied, except  
525 a modest association with valley/minimum dose.

## 526 **Valley dose**

527 The strongest association we observed is a weak one between body weight change and  
528 valley/min dose ( $R^2=0.3814$ , F-stat=13.56\*\*) (Table 3). Note that valley/min dose is also strongly  
529 associated with tumor treatment response ( $R^2=0.7636$ , F-stat=12.92\*). Our finding is consistent

530 with a normal mouse brain MRT study Nakayma et al. reported that valley dose is one of the  
531 important factors to determine normal brain dose tolerance (40). Our data suggests that valley  
532 dose may have a close correlation with both tumor control and toxicity, and thus is a crucial  
533 dosimetric parameter in SFRT treatment.

### 534 **Valley width, peak width, percentage volume irradiated**

535 The valley width, peak width, and percentage volume of the tumor that is irradiated  
536 parameters were only weakly associated with animal body weight change post radiation  
537 ( $R^2=0.2853$ ,  $F\text{-stat}=8.783^{**}$ ;  $R^2=0.2759$ ,  $F\text{-stat}=8.382^{**}$ ; and  $R^2=0.1985$ ,  $F\text{-stat}=5.448^*$ ,  
538 respectively) (Fig 8 and Table 3). Note that in this study peak width and valley width are closely  
539 correlated (more discussion on correlations, below). Percentage volume directly irradiated  
540 showed no statistically important association with body weight change. Neuner et al. reported  
541 that they observed similar treatment responses from clinical GRID treatments of different  
542 percentages of volume directly irradiated (2).

### 543 **Normal tissue EUD, PVDR, volume-averaged dose, peak dose**

544 The normal tissue EUD, PVDR, volume-averaged dose, and peak dose parameters  
545 showed little to no association with body weight change post radiation ( $R^2=1.022\times 10^{-03}$ ,  $F\text{-}$   
546  $\text{stat}=0.882$  (not sig.);  $R^2=0.1203$ ,  $F\text{-stat}=3.009$  (not sig.);  $R^2=0.03308$ ,  $F\text{-stat}=.7526$  (not sig.); and  
547  $R^2=5.99\times 10^{-06}$ ,  $F\text{-stat}=1.32\times 10^{-04}$  (not sig.), respectively). Our finding is consistent with a rat  
548 normal brain minibeam study by Prezado et al. showing arms with similar volume-average-doses  
549 have drastic differences in survival (14) and inconsistent with a MRT study on normal mouse skin  
550 by Priyadarshika et al. concluded that integrated dose (i.e., volume-averaged dose) rather than  
551 peak or valley dose, may dictate the acute skin toxicity (41).

### 552 **2mm wide beam array SFRT**

553 Our data indicates that the 20Gy2mmSFRT arm is not only the most relevant to clinical  
554 application because of its millimeter scale, but it also has the potential for superior therapeutic

555 ratio. The 20Gy2mmSFRT arm showed similar survival with the 50GySFRT arm but has  
556 significantly lower valley dose (6.2 Gy vs. 17 Gy). At the same time, it showed the least, if any,  
557 body weight change compared to the untreated arm while the 50GySFRT arm with 0.31mm beam  
558 width exhibited significant body weight growth deficit (Table 1 and Fig 6). The 20GyUniform arm  
559 has the best tumor treatment response and the worst body weight change. Our data indicated the  
560 2mm wide beam array is a kV photon SFRT pattern that has the potential for high therapeutic  
561 ratio SFRT and deserves further investigation.

## 562 **Cross-correlation in the SFRT dosimetry parameters**

563 The dosimetric parameters studied in this work are not all independent variables and their  
564 cross-correlations are shown in the table of Pearson Correlation coefficients (Table 4.) The larger  
565 the magnitude of the coefficient, the more co-linear and correlated the pair of dosimetric  
566 parameters. In this study, peak width and valley width are perfectly co-linear (correlation of 1.0)  
567 by study design. Valley/min dose, a parameter used in tumor EUD calculation, is also highly  
568 correlated with tumor EUD (correlation of 0.99). These strong correlations explain the similar  
569 statistical associations of these parameters with treatment responses. These correlations also  
570 limited the study's ability to better exam the association between a given treatment response with  
571 each of the dosimetric parameters.

572

573 **Table 4: Pearson Correlation coefficient matrix for the eight SFRT dosimetric parameters**  
574 **relevant for tumor treatment response.**

|             | Valley Dose | Peak Dose | AVG Dose | Tissue EUD | Tumor EUD | Peak Width | Valley Width | PVDR | % Vol. Irradiated |
|-------------|-------------|-----------|----------|------------|-----------|------------|--------------|------|-------------------|
| Valley Dose | 1.00        |           |          |            |           |            |              |      |                   |
| Peak Dose   | 0.38        | 1.00      |          |            |           |            |              |      |                   |
| AVG Dose    | 0.63        | 0.91      | 1.00     |            |           |            |              |      |                   |

|                   |       |       |      |       |       |       |       |       |      |
|-------------------|-------|-------|------|-------|-------|-------|-------|-------|------|
| Tissue EUD        | 0.44  | 0.99  | 0.95 | 1.00  |       |       |       |       |      |
| Tumor EUD         | 0.99  | 0.26  | 0.53 | 0.32  | 1.00  |       |       |       |      |
| Peak Width        | 0.63  | -0.36 | 0.00 | -0.28 | 0.72  | 1.00  |       |       |      |
| Valley Width      | 0.65  | -0.34 | 0.02 | -0.25 | 0.74  | 1.00  | 1.00  |       |      |
| PVDR              | -0.57 | 0.64  | 0.40 | 0.61  | -0.67 | -0.78 | -0.77 | 1.00  |      |
| % Vol. Irradiated | 0.70  | -0.26 | 0.13 | -0.17 | 0.78  | 0.93  | 0.93  | -0.94 | 1.00 |

575

## 576 Summary

577 In this conventional dose rate small animal SFRT study we used a large range of radiation  
578 spatial fractionation scales to study the association of dosimetric parameters with treatment  
579 response. We concluded that valley/minimum dose, tumor EUD, and percentage tumor irradiated  
580 have strong and proportional associations with tumor treatment response while peak dose  
581 exhibited little association. Among the SFRT dosimetric parameters studied valley/min dose also  
582 showed the highest but modest association with body weight change post radiation.

## 583 Acknowledgments

584 One of the authors (Chang) acknowledges Dr. Mark W. Dewhirst for his decade long  
585 unwavering encouragements and expert radiobiology advices, which are invaluable for this (and  
586 other) original work exploring the magic of radiation spatial fractionation. One of authors (Rivera)  
587 expresses her appreciation to Leith Rankine, MS for his kind help on EUD calculation.

588

## 589 Reference List

590 1. Schultke E, Balosso J, Breslin T, Cavaletti G, Djonov V, Esteve F, Grotzer M, Hildebrandt G,  
591 Valdman A, Laissue J. Microbeam radiation therapy - grid therapy and beyond: a clinical  
592 perspective. Br J Radiol. 2017;90(1078):20170073. Epub 2017/07/28. doi: 10.1259/bjr.20170073.  
593 PubMed PMID: 28749174; PMCID: PMC5853350.



- 594 2. Neuner G, Mohiuddin MM, Vander Walde N, Goloubeva O, Ha J, Yu CX, Regine WF. High-  
595 dose spatially fractionated GRID radiation therapy (SFGRT): a comparison of treatment outcomes  
596 with Cerrobend vs. MLC SFGRT. *Int J Radiat Oncol Biol Phys.* 2012;82(5):1642-9. Epub 2011/05/03.  
597 doi: 10.1016/j.ijrobp.2011.01.065. PubMed PMID: 21531514.
- 598 3. Laissue JA, Blattmann H, Slatkin DN. [Alban Kohler (1874-1947): Inventor of grid therapy].  
599 *Z Med Phys.* 2012;22(2):90-9. Epub 2011/08/25. doi: 10.1016/j.zemedi.2011.07.002. PubMed  
600 PMID: 21862299.
- 601 4. Eling L, Bouchet A, Nemoz C, Djonov V, Balosso J, Laissue J, Brauer-Krisch E, Adam JF,  
602 Serduc R. Ultra high dose rate Synchrotron Microbeam Radiation Therapy. Preclinical evidence in  
603 view of a clinical transfer. *Radiother Oncol.* 2019;139:56-61. Epub 2019/07/17. doi:  
604 10.1016/j.radonc.2019.06.030. PubMed PMID: 31307824.
- 605 5. Billena C, Khan AJ. A Current Review of Spatial Fractionation: Back to the Future? *Int J*  
606 *Radiat Oncol Biol Phys.* 2019;104(1):177-87. Epub 2019/01/27. doi: 10.1016/j.ijrobp.2019.01.073.  
607 PubMed PMID: 30684666.
- 608 6. Eling L, Bouchet A, Nemoz C, Djonov V, Balosso J, Laissue J, Brauer-Krisch E, Francois Adam  
609 J, Serduc R. Ultra high dose rate Synchrotron Microbeam Radiation Therapy. Preclinical evidence  
610 in view of a clinical transfer. *Radiother Oncol.* 2019;in press.
- 611 7. Bravin A, Olko P, Schultke E, Wilkens JJ. SYRA3 COST Action - Microbeam radiation therapy:  
612 Roots and prospects. *Phys Med.* 2015;31(6):561-3. doi: 10.1016/j.ejmp.2015.06.002. PubMed  
613 PMID: 26123367.
- 614 8. Ha JK, Zhang G, Naqvi SA, Regine WF, Yu CX. Feasibility of delivering grid therapy using a  
615 multileaf collimator. *Med Phys.* 2006;33(1):76-82. Epub 2006/02/21. PubMed PMID: 16485412.
- 616 9. Blanco Suarez JM, Amendola BE, Perez N, Amendola M, Wu X. The Use of Lattice Radiation  
617 Therapy (LRT) in the Treatment of Bulky Tumors: A Case Report of a Large Metastatic Mixed  
618 Mullerian Ovarian Tumor. *Cureus.* 2015;7(11):e389. Epub 2016/01/01. doi: 10.7759/cureus.389.  
619 PubMed PMID: 26719832; PMCID: PMC4689595.
- 620 10. Narayanasamy G, Zhang X, Meigooni A, Paudel N, Morrill S, Maraboyina S, Peacock L,  
621 Penagaricano J. Therapeutic benefits in grid irradiation on Tomotherapy for bulky, radiation-  
622 resistant tumors. *Acta Oncol.* 2017;56(8):1043-7. Epub 2017/03/09. doi:  
623 10.1080/0284186X.2017.1299219. PubMed PMID: 28270018.
- 624 11. Zhang X, Penagaricano J, Yan Y, Sharma S, Griffin RJ, Hardee M, Han EY, Ratanatharathom  
625 V. Application of Spatially Fractionated Radiation (GRID) to Helical Tomotherapy using a Novel  
626 TOMOGRID Template. *Technol Cancer Res Treat.* 2016;15(1):91-100. Epub 2013/09/05. doi:  
627 10.7785/tcrtexpress.2013.600261. PubMed PMID: 24000988.
- 628 12. Dilmanian FA, Eley JG, Krishnan S. Minibeam therapy with protons and light ions: physical  
629 feasibility and potential to reduce radiation side effects and to facilitate hypofractionation. *Int J*  
630 *Radiat Oncol Biol Phys.* 2015;92(2):469-74. doi: 10.1016/j.ijrobp.2015.01.018. PubMed PMID:  
631 25771360; PMCID: PMC4810455.
- 632 13. Martinez-Rovira I, Gonzalez W, Brons S, Prezado Y. Carbon and oxygen minibeam  
633 radiation therapy: An experimental dosimetric evaluation. *Med Phys.* 2017;44(8):4223-9. doi:  
634 10.1002/mp.12383. PubMed PMID: 28556241.
- 635 14. Prezado Y, Deman P, Varlet P, Jouvion G, Gil S, Le Clec HC, Bernard H, Le Duc G, Sarun S.  
636 Tolerance to Dose Escalation in Minibeam Radiation Therapy Applied to Normal Rat Brain: Long-

- 637 Term Clinical, Radiological and Histopathological Analysis. *Radiat Res.* 2015;184(3):314-21. doi:  
638 10.1667/RR14018.1. PubMed PMID: 26284420.
- 639 15. Prezado Y, Sarun S, Gil S, Deman P, Bouchet A, Le Duc G. Increase of lifespan for glioma-  
640 bearing rats by using minibeam radiation therapy. *J Synchrotron Radiat.* 2012;19(Pt 1):60-5. doi:  
641 10.1107/S0909049511047042. PubMed PMID: 22186645.
- 642 16. Prezado Y, Dos Santos M, Gonzalez W, Jouvion G, Guardiola C, Heinrich S, Labiod D,  
643 Juchaux M, Jourdain L, Sebric C, Pouzoulet F. Transfer of Minibeam Radiation Therapy into a cost-  
644 effective equipment for radiobiological studies: a proof of concept. *Sci Rep.* 2017;7(1):17295.  
645 Epub 2017/12/13. doi: 10.1038/s41598-017-17543-3. PubMed PMID: 29229965; PMCID:  
646 PMC5725561.
- 647 17. Bazyar S, Inscoe CR, O'Brian ET, Zhou O, Lee YZ. Minibeam radiotherapy with small animal  
648 irradiators; in vitro and in vivo feasibility studies. *Phys Med Biol.* 2017;62(23):8924-42. Epub  
649 2017/11/11. doi: 10.1088/1361-6560/aa926b. PubMed PMID: 29125832.
- 650 18. Terahara A, Niemierko A, Goitein M, Finkelstein D, Hug E, Liebsch N, O'Farrell D, Lyons S,  
651 Munzenrider J. Analysis of the relationship between tumor dose inhomogeneity and local control  
652 in patients with skull base chordoma. *Int J Radiat Oncol Biol Phys.* 1999;45(2):351-8. Epub  
653 1999/09/16. doi: 10.1016/s0360-3016(99)00146-7. PubMed PMID: 10487555.
- 654 19. Brauer-Krisch E, Serduc R, Siegbahn E, Le Duc G, Prezado Y, Bravin A, Blattmann H, Laissue  
655 J. Effects of pulsed, spatially fractionated, microscopic synchrotron X-ray beams  
656 on normal and tumoral brain tissue. *Mutat Res.* 2010;704:160-6.
- 657 20. Favaudon V, Fouillade C, Vozenin MC. [Ultrahigh dose-rate, "flash" irradiation minimizes  
658 the side-effects of radiotherapy]. *Cancer Radiother.* 2015;19(6-7):526-31. Epub 2015/08/19. doi:  
659 10.1016/j.canrad.2015.04.006. PubMed PMID: 26277238.
- 660 21. Montay-Gruel P, Bouchet A, Jaccard M, Patin D, Serduc R, Aim W, Petersson K, Petit B,  
661 Bailat C, Bourhis J, Brauer-Krisch E, Vozenin MC. X-rays can trigger the FLASH effect: Ultra-high  
662 dose-rate synchrotron light source prevents normal brain injury after whole brain irradiation in  
663 mice. *Radiother Oncol.* 2018. Epub 2018/09/05. doi: 10.1016/j.radonc.2018.08.016. PubMed  
664 PMID: 30177374.
- 665 22. Society C-SbNCITR. Workshop on Understanding High-Dose, Ultra-dose-rate and Spatial  
666 Fractionated radiotherapy 2018 [August 21, 2018].
- 667 23. Kasoji SK, Rivera JN, Gessner RC, Chang SX, Dayton PA. Early Assessment of Tumor  
668 Response to Radiation Therapy using High-Resolution Quantitative Microvascular Ultrasound  
669 Imaging. *Theranostics.* 2018;8(1):156-68. Epub 2018/01/02. doi: 10.7150/thno.19703. PubMed  
670 PMID: 29290799; PMCID: PMC5743466.
- 671 24. Schroeder T, Yuan H, Viglianti BL, Peltz C, Asopa S, Vujaskovic Z, Dewhirst MW. Spatial  
672 heterogeneity and oxygen dependence of glucose consumption in R3230Ac and fibrosarcomas  
673 of the Fischer 344 rat. *Cancer Res.* 2005;65(12):5163-71. Epub 2005/06/17. doi: 10.1158/0008-  
674 5472.CAN-04-3900. PubMed PMID: 15958560.
- 675 25. Fix SM, Papadopoulou V, Velds H, Kasoji SK, Rivera JN, Borden MA, Chang S, Dayton PA.  
676 Oxygen microbubbles improve radiotherapy tumor control in a rat fibrosarcoma model - A  
677 preliminary study. *PLoS One.* 2018;13(4):e0195667. Epub 2018/04/10. doi:  
678 10.1371/journal.pone.0195667. PubMed PMID: 29630640; PMCID: PMC5891067.
- 679 26. Hickman DL, M. S. Use of a Body Condition Score Technique to Assess Health Status in a  
680 Rat Model of Polycystic Kidney Disease. *J Am Assoc Lab Anim Sci.* 2010;49(2):155-9.

- 681 27. Niemierko A. Reporting and analyzing dose distributions: a concept of equivalent uniform  
682 dose. *Med Phys.* 1997;24(1):103-10. Epub 1997/01/01. doi: 10.1118/1.598063. PubMed PMID:  
683 9029544.
- 684 28. Faustino-Rocha A, Oliveira PA, Pinho-Oliveira J, Teixeira-Guedes C, Soares-Maia R, da  
685 Costa RG, Colaco B, Pires MJ, Colaco J, Ferreira R, Ginja M. Estimation of rat mammary tumor  
686 volume using caliper and ultrasonography measurements. *Lab Anim (NY)*. 2013;42(6):217-24.  
687 Epub 2013/05/22. doi: 10.1038/labam.254. PubMed PMID: 23689461.
- 688 29. Gessner RC, Frederick CB, Foster FS, Dayton PA. Acoustic Angiography: A New Imaging  
689 Modality for Assessing Microvasculature Architecture. *International Journal of Biomedical Imaging*.  
690 2013;2013. doi: <https://doi.org/10.1155/2013/936593>.
- 691 30. ALLISON PD. SURVIVAL ANALYSIS USING SAS: PRACTICAL GUIDE. 5TH ed. Cary, NC: SAS  
692 Institute, Inc; 2010.
- 693 31. Kutner MH, Nachtsheim C, Neter J, Li W. Applied linear statistical models. 5th ed. Irwin,  
694 NY: McGraw-Hill; 2005.
- 695 32. Bouchet A, Sakakini N, El Atifi M, Le Clec'h C, Brauer E, Moisan A, Deman P, Rihet P, Le  
696 Duc G, Pelletier L. Early gene expression analysis in 9L orthotopic tumor-bearing rats identifies  
697 immune modulation in molecular response to synchrotron microbeam radiation therapy. *PLoS*  
698 *One*. 2013;8(12):e81874. doi: 10.1371/journal.pone.0081874. PubMed PMID: 24391709; PMCID:  
699 PMC3876987.
- 700 33. Fontanella AN, Boss MK, Hadsell M, Zhang J, Schroeder T, Berman KG, Dewhirst MW,  
701 Chang SX, Palmer GM. Effects of High-Dose Microbeam Irradiation on Tumor Microvascular  
702 Function and Angiogenesis. *Rad Res.* 2015;183(1).
- 703 34. Chang SX, Rivera JN, Herity LB, Price LB, Madden AJ, Santos C, Darr DB, Zamboni WC.  
704 Comparison of microbeam versus conventional broadbeam radiation therapy on tumor delivery  
705 enhancement of PEGylated liposomal doxorubicin in a triple negative breast cancer mouse model.  
706 *Cancer Res.* 2017;77(13). doi: DOI: 10.1158/1538-7445.AM2017-5051.
- 707 35. Yang Y, Swierczak A, Ibahim M, Paiva P, Cann L, Stevenson AW, Crosbie JC, Anderson RL,  
708 Rogers PAW. Synchrotron microbeam radiotherapy evokes a different early tumor  
709 immunomodulatory response to conventional radiotherapy in EMT6.5 mammary tumors.  
710 *Radiother Oncol.* 2019;133:93-9. Epub 2019/04/03. doi: 10.1016/j.radonc.2019.01.006. PubMed  
711 PMID: 30935588.
- 712 36. Mavroidis P, Lind B, Brahme A. Biologically effective uniform dose for specification, report  
713 and comparison of dose response relations and treatment plans. *Phys Med Biol.* 2001;46:2607-30.
- 714 37. Serduc R, Brauer-Krisch E, Siegbahn EA, Bouchet A, Pouyatos B, Carron R, Pannetier N,  
715 Renaud L, Berruyer G, Nemoz C, Brochard T, Remy C, Barbier EL, Bravin A, Le Duc G, Depaulis A,  
716 Esteve F, Laissue JA. High-precision radiosurgical dose delivery by interlaced microbeam arrays  
717 of high-flux low-energy synchrotron X-rays. *PLoS One*.5(2):e9028. doi:  
718 10.1371/journal.pone.0009028. PubMed PMID: 20140254.
- 719 38. Ibahim MJ, Crosbie JC, Yang Y, Zaitseva M, Stevenson AW, Rogers PA, Paiva P. An  
720 evaluation of dose equivalence between synchrotron microbeam radiation therapy and  
721 conventional broad beam radiation using clonogenic and cell impedance assays. *PLoS One*.  
722 2014;9(6):e100547. Epub 2014/06/20. doi: 10.1371/journal.pone.0100547. PubMed PMID:  
723 24945301; PMCID: PMC4063937.

- 724 39. Serduc R, Bouchet A, Brauer-Krisch E, Laissue JA, Spiga J, Sarun S, Bravin A, Fonta C,  
725 Renaud L, Boutonnat J, Siegbahn EA, Esteve F, Le Duc G. Synchrotron microbeam radiation  
726 therapy for rat brain tumor palliation-influence of the microbeam width at constant valley dose.  
727 Phys Med Biol. 2009;54(21):6711-24. doi: 10.1088/0031-9155/54/21/017. PubMed PMID:  
728 19841517.
- 729 40. Nakayma M, Mukumoto N, Akasaka H, Miyawaki D, Nishimura H, Umetani K, Nariyama N,  
730 Kondoh T, Shinohara K, Sasaki R. Dose estimation of normal brain tissue tolerance for microbeam  
731 radiation therapy. Radiat oncology biology and physics. 2014;90(1):S804.
- 732 41. Priyadarshika RC, Crosbie JC, Kumar B, Rogers PA. Biodosimetric quantification of short-  
733 term synchrotron microbeam versus broad-beam radiation damage to mouse skin using a  
734 dermatopathological scoring system. Br J Radiol. 2011;84(1005):833-42. doi:  
735 10.1259/bjr/58503354. PubMed PMID: 21849367; PMCID: PMC3473783.
- 736

737

## 738 Supporting Information

739 **S1 Fig. Illustration of treatment delivery verification analysis by film.** (A) The post-  
740 treatment verification film for a 20GyHalfSFRT treated tumor shows that only one-half the tumor  
741 was treated as intended. The black dashed line in the photograph was drawn to illustrate which  
742 half of the tumor was irradiated. (B) The verification films for all 5 animals included in the study  
743 arm were analyzed by calculating the percentage area of the tumor irradiated.

744

745 **S1 Table. Univariate linear regression analysis of Survival Day 17.** This is the full table of  
746 coefficients for the corresponding linear regression models used in Fig 7. We analyze 8 models  
747 with single covariates, one for each dosimetric parameter and list their corresponding statistics.  
748 Tumor EUD and Valley Dose have the largest magnitude of effect on Survival (Day 17) and  
749 together with % Volume Irradiated are statistically significant. However, analyzing data for a  
750 single timepoint (Day17) is limited by animal losses at Day 17 (missing data), so we include a  
751 more robust statistical model that utilizes all the data in **Table 3**.

752

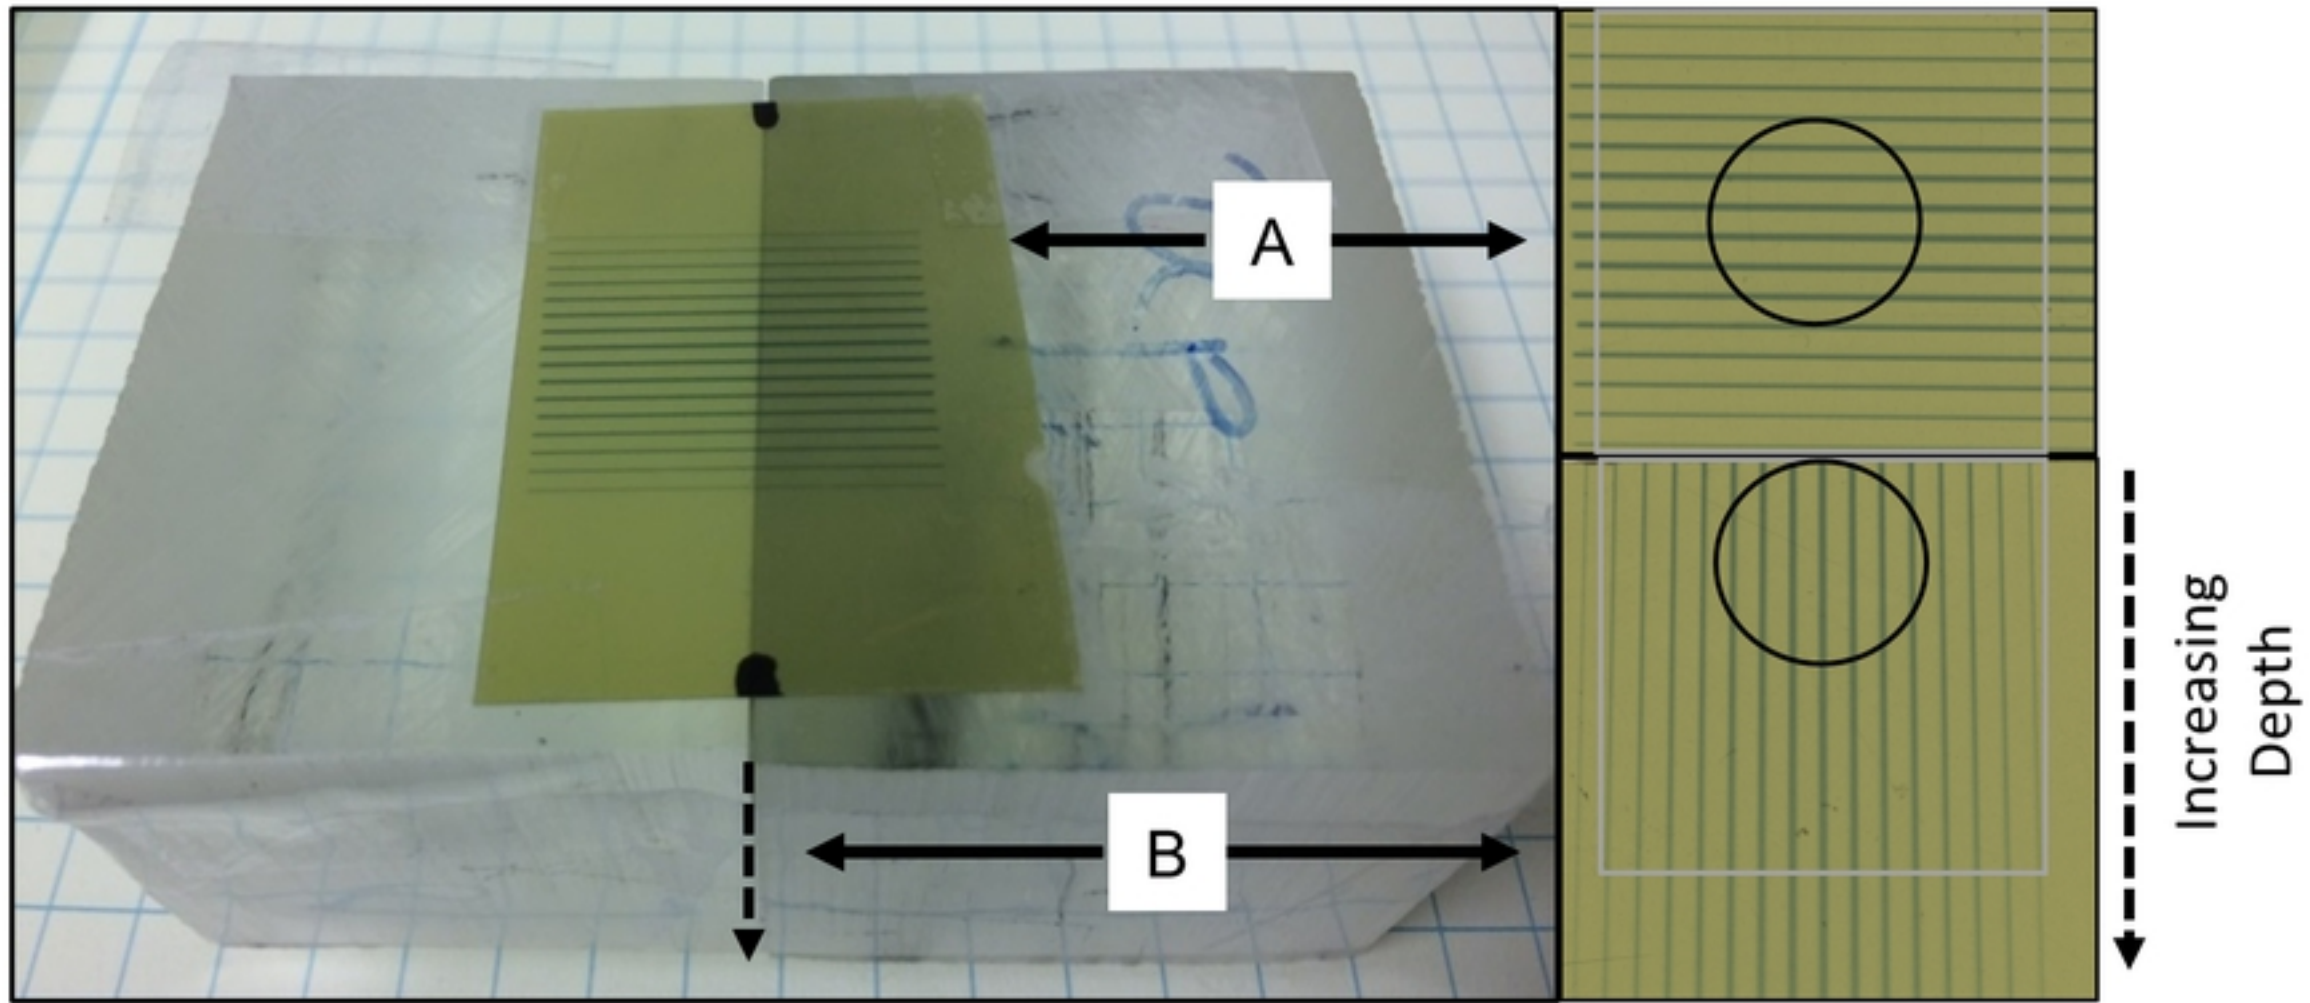

Figure 3



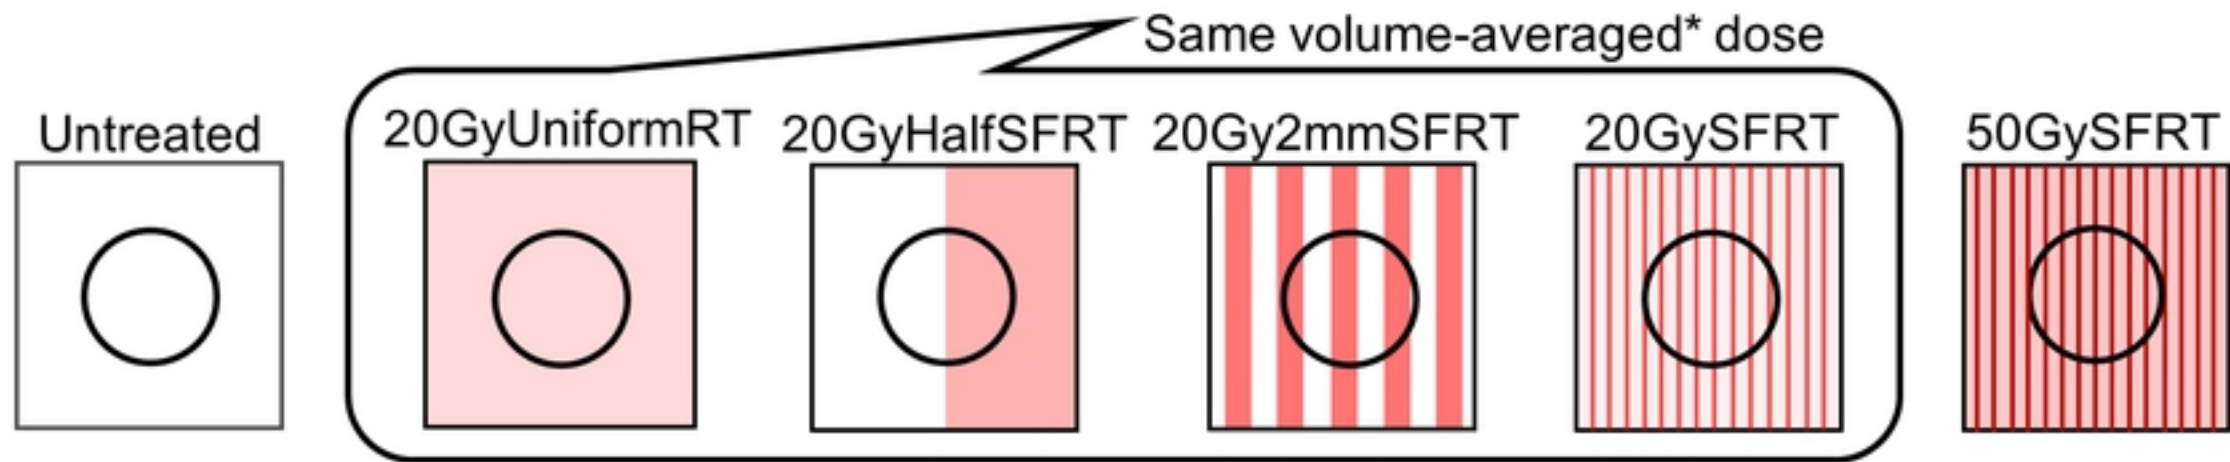

Figure 1

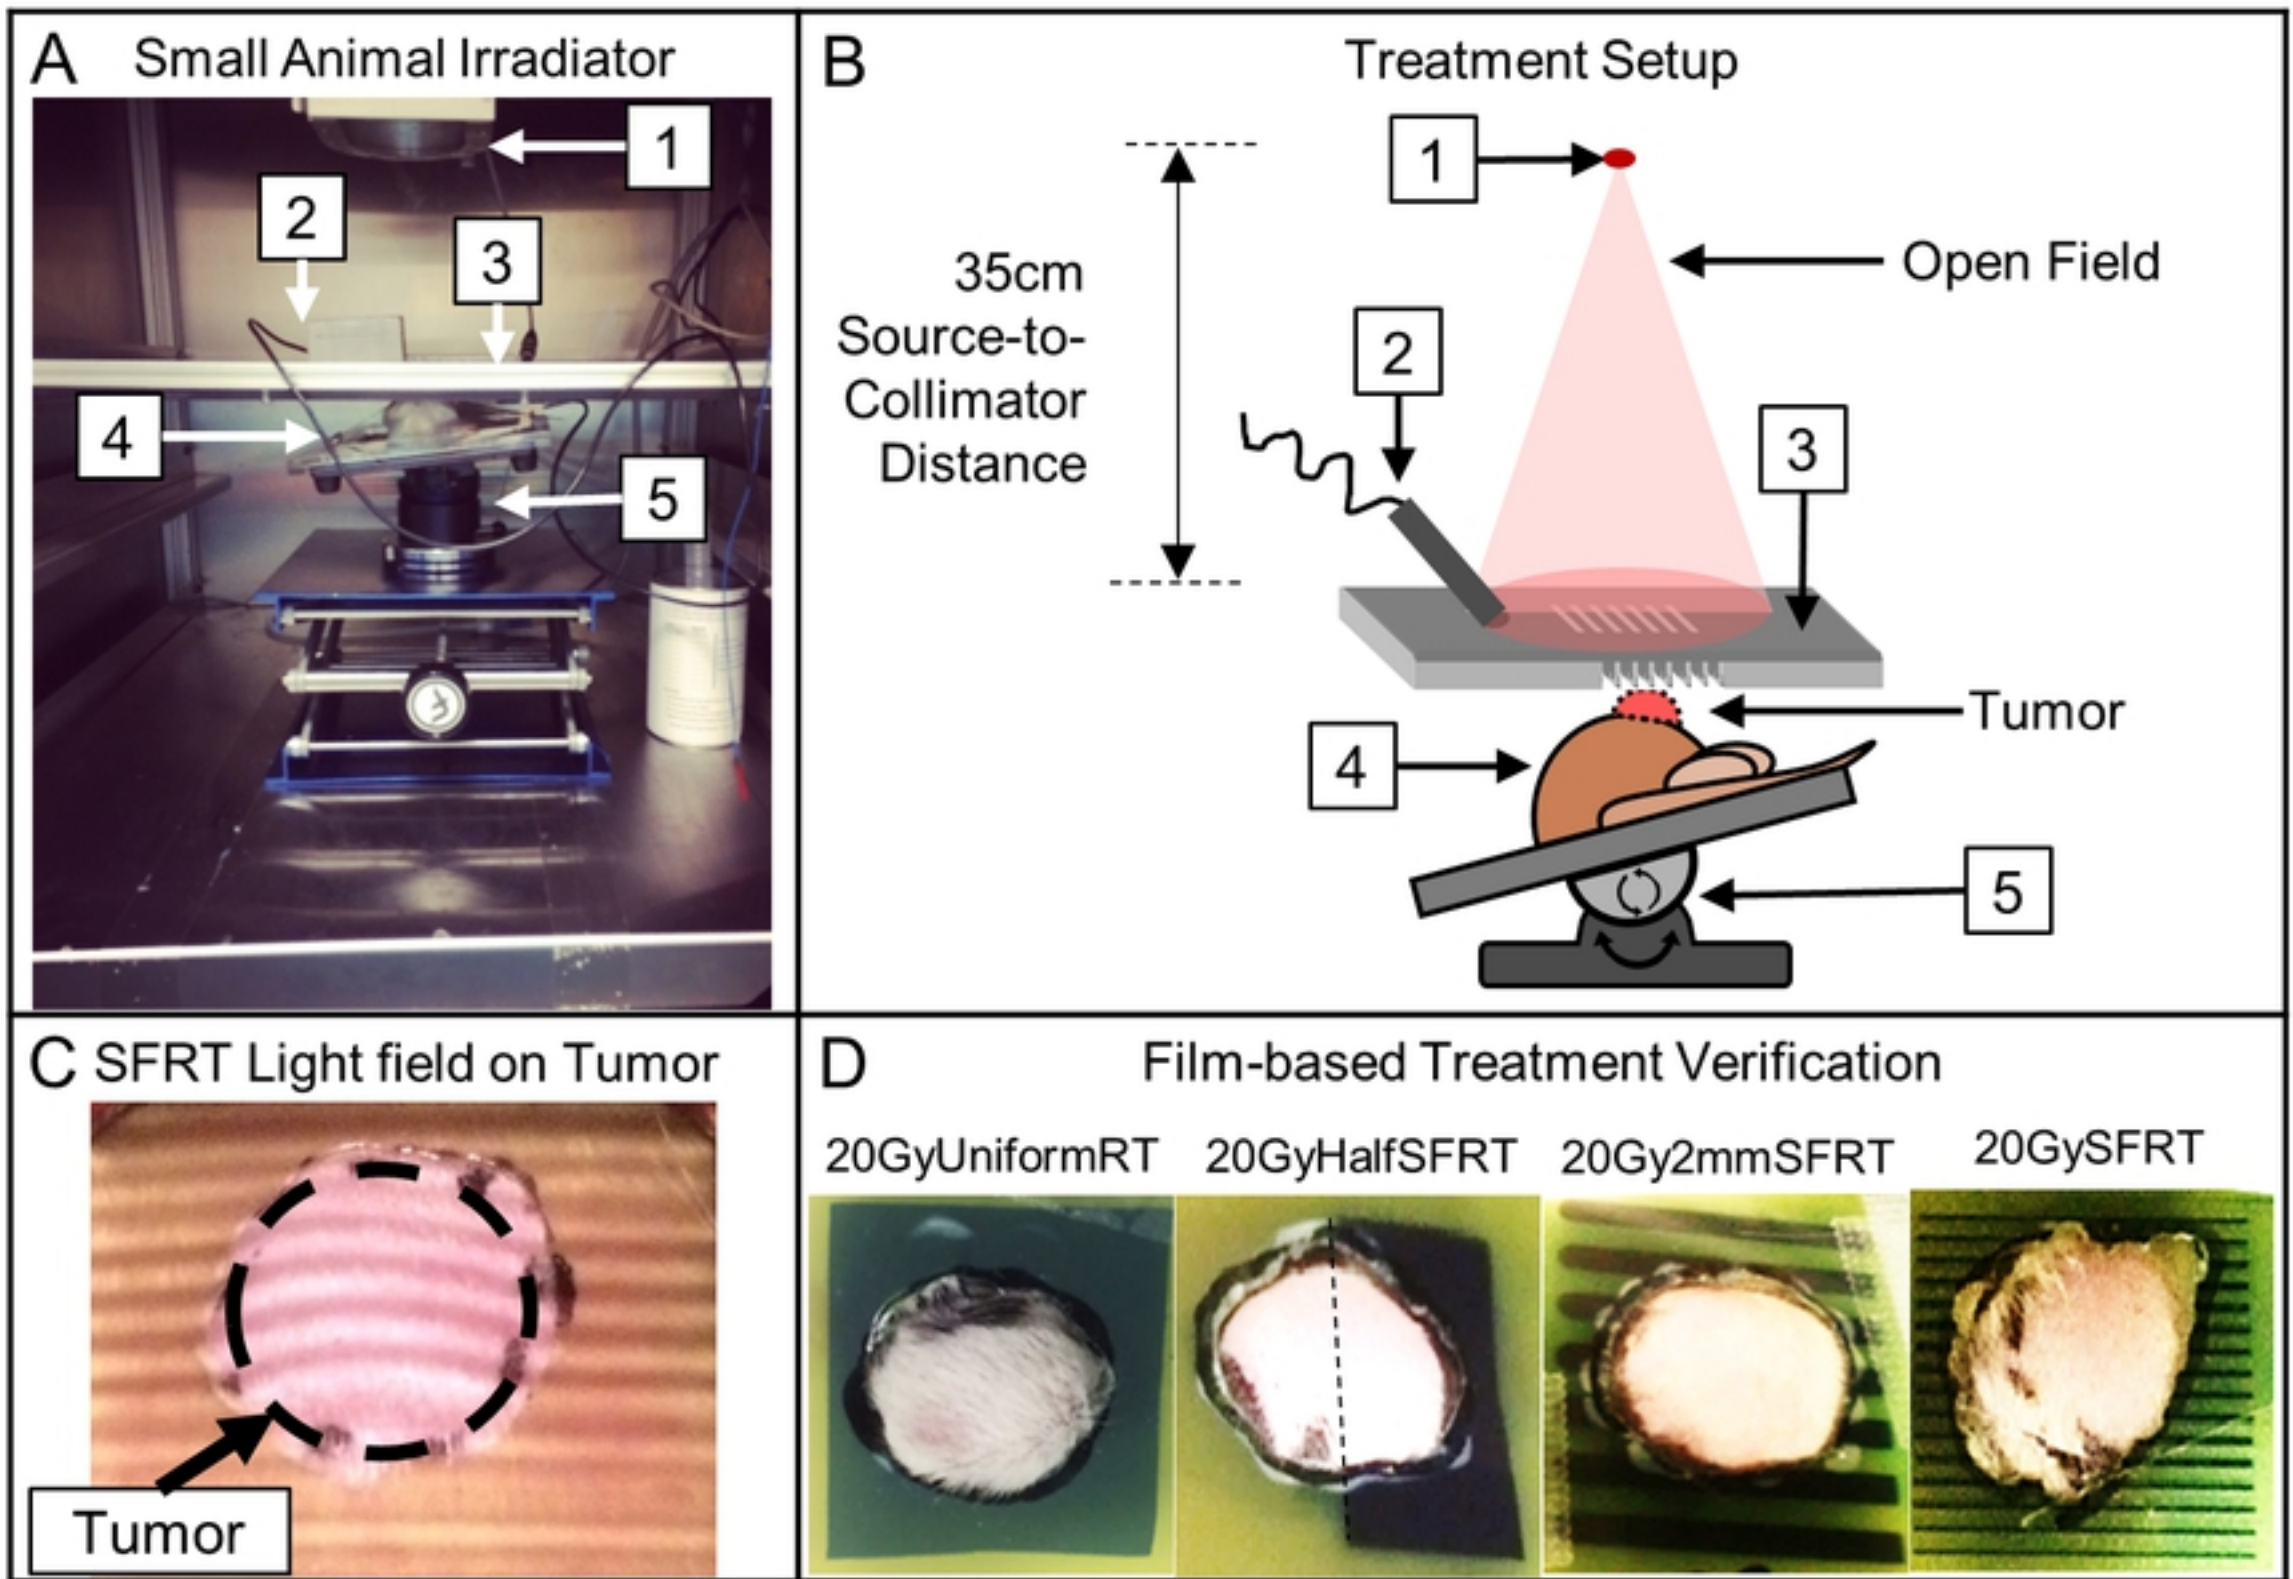

Figure 2

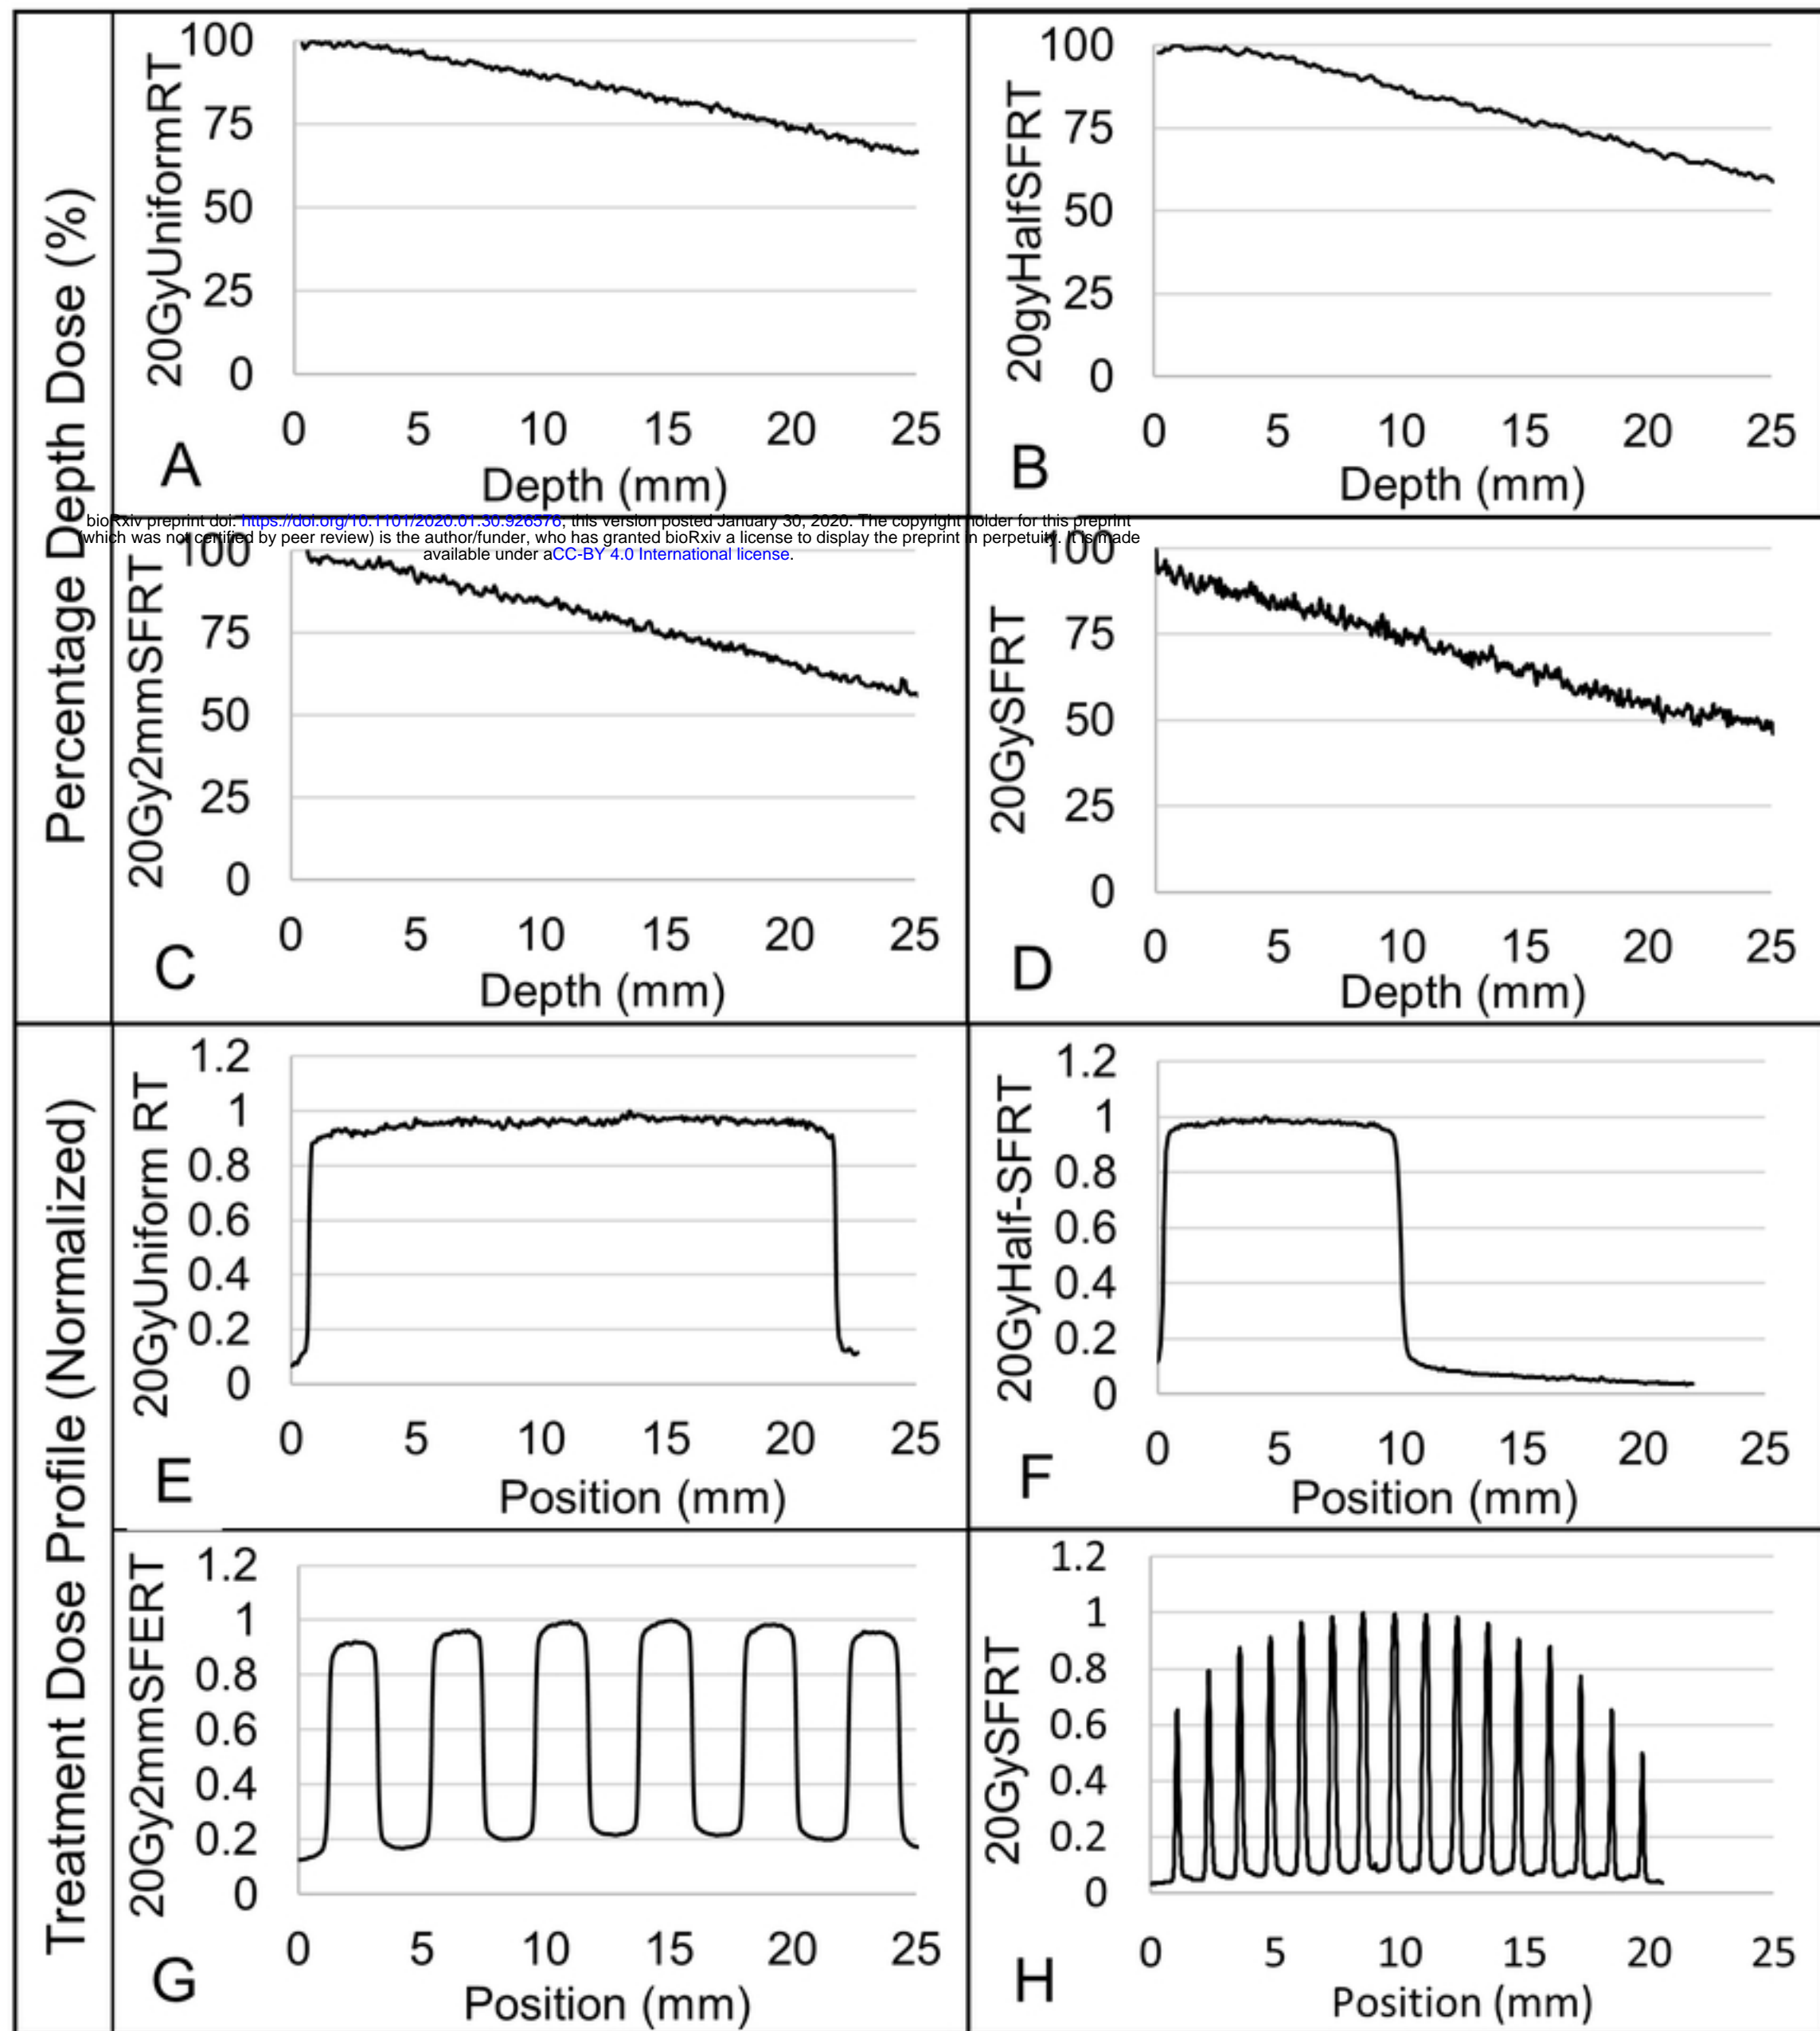

Figure 4



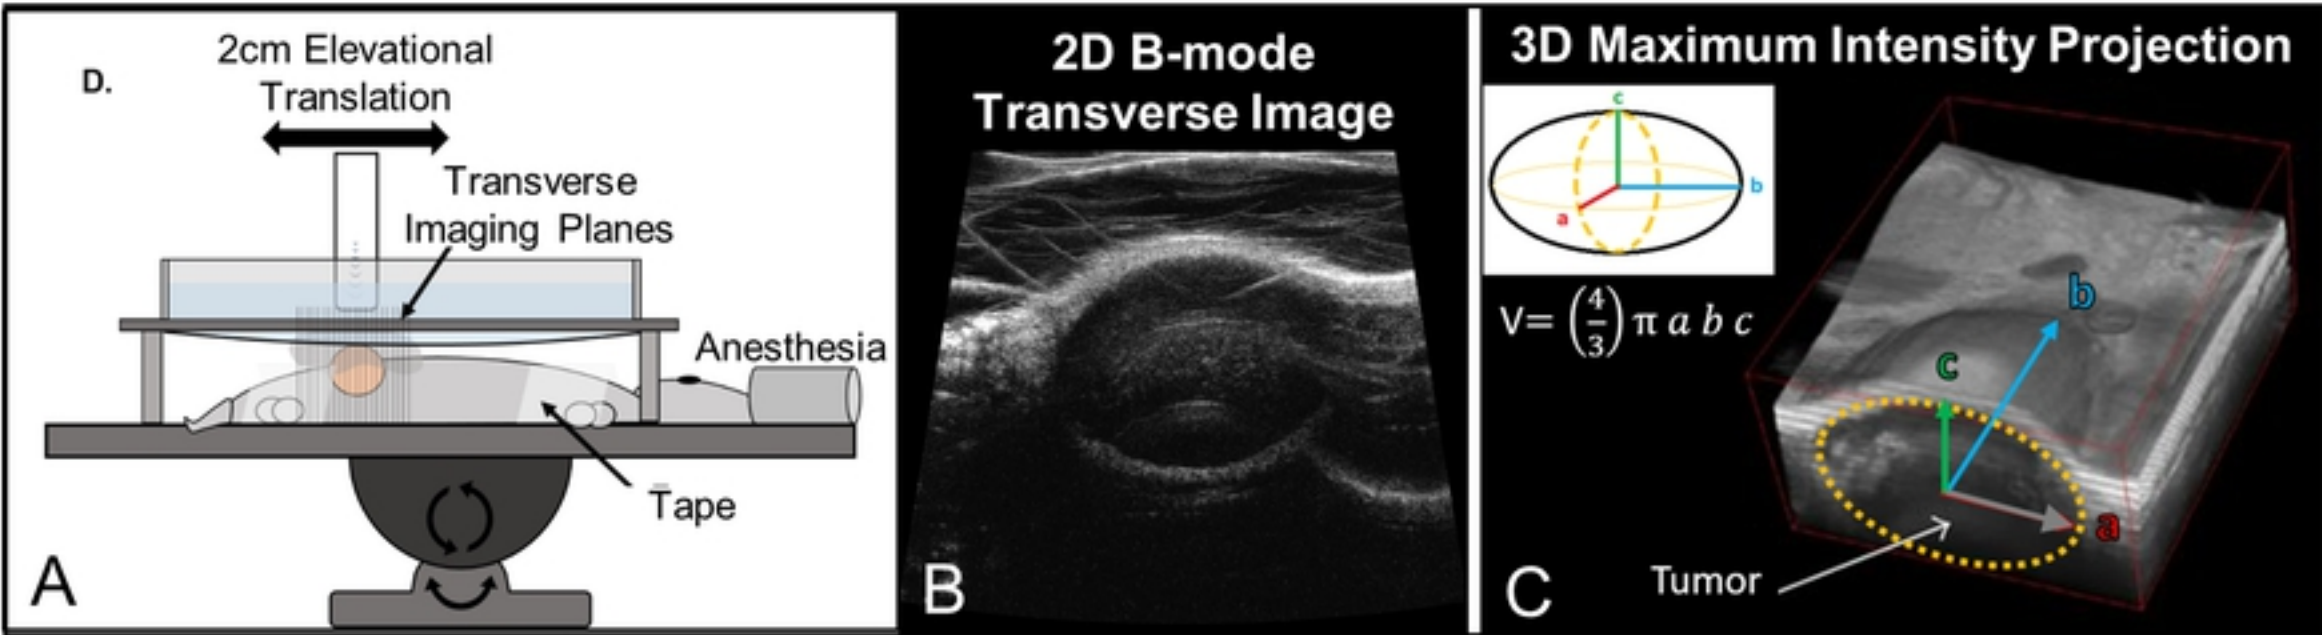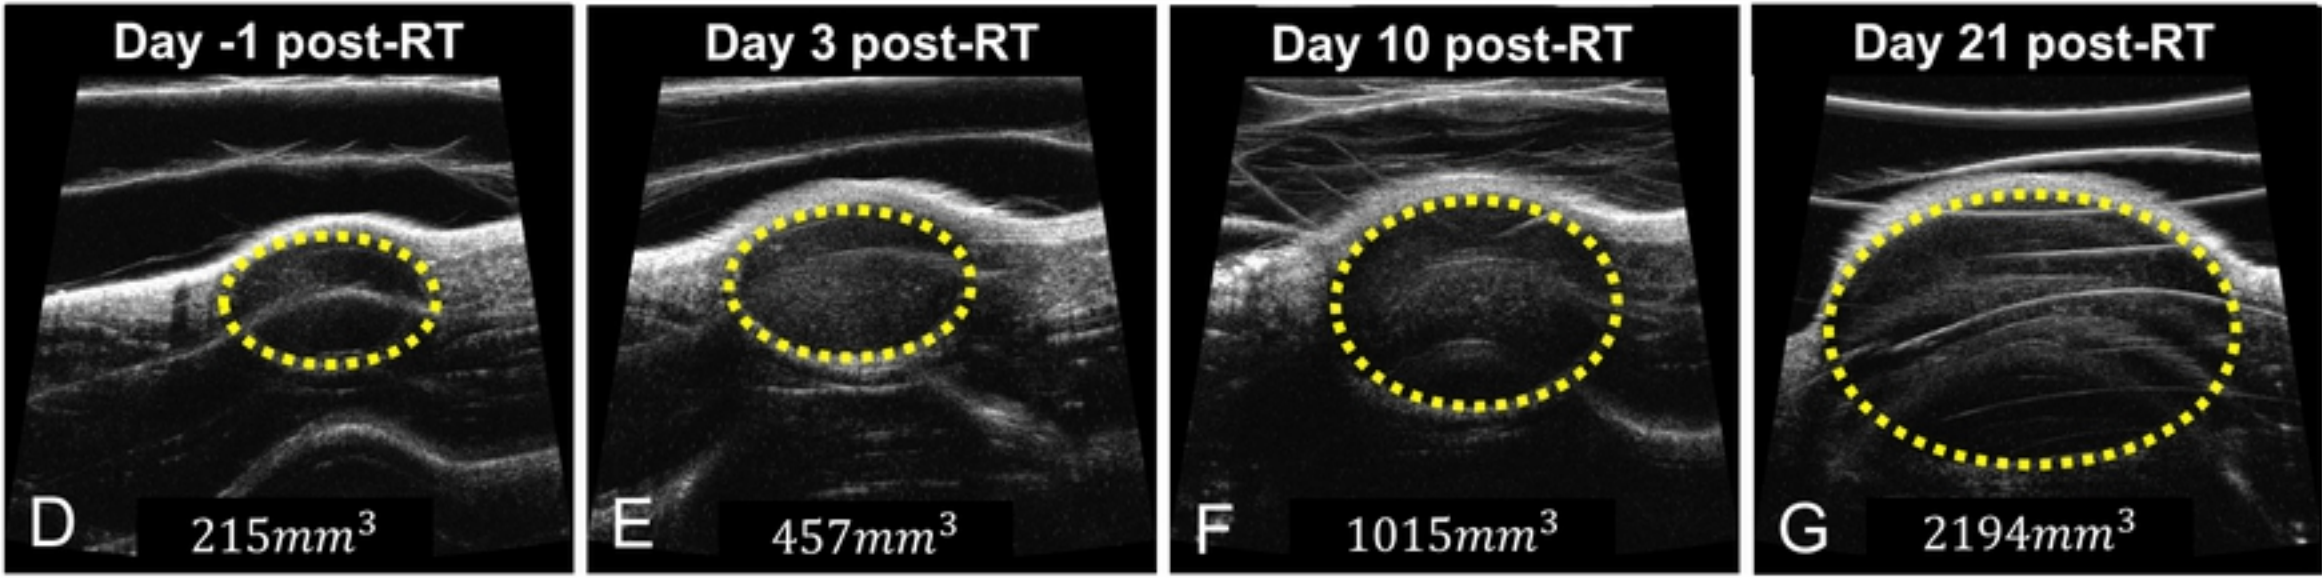

Figure 5

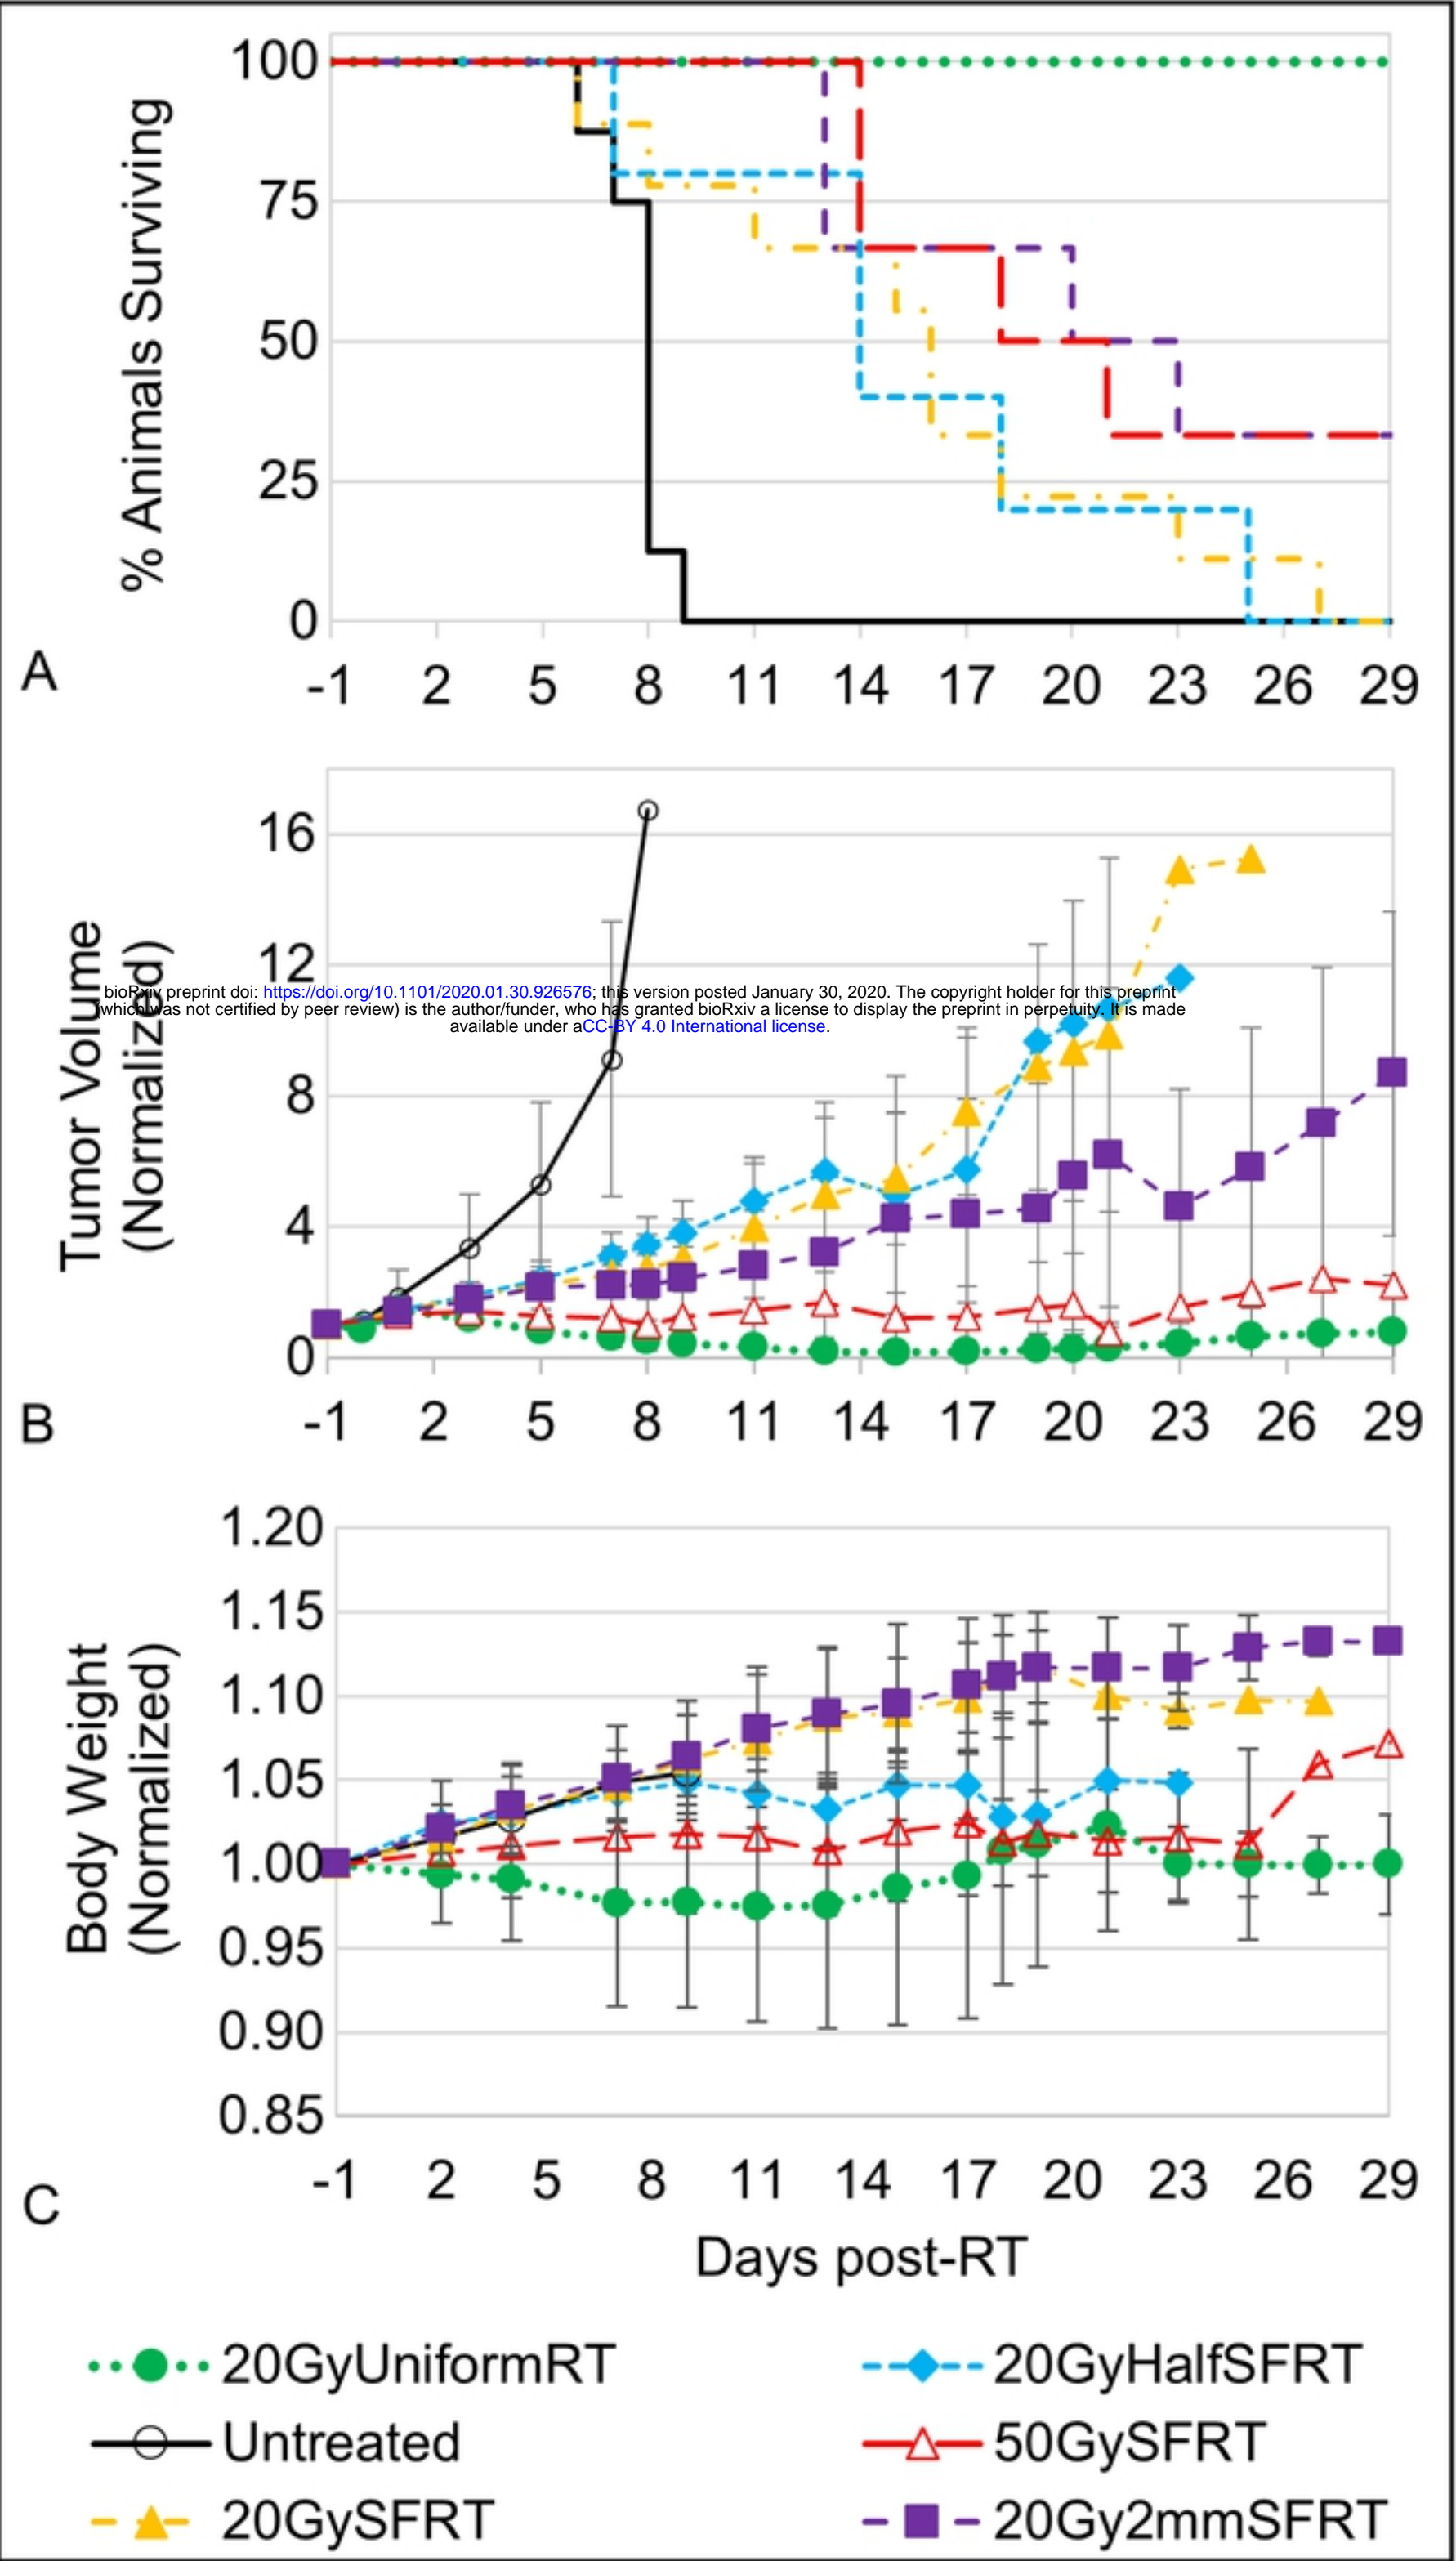

Figure 6



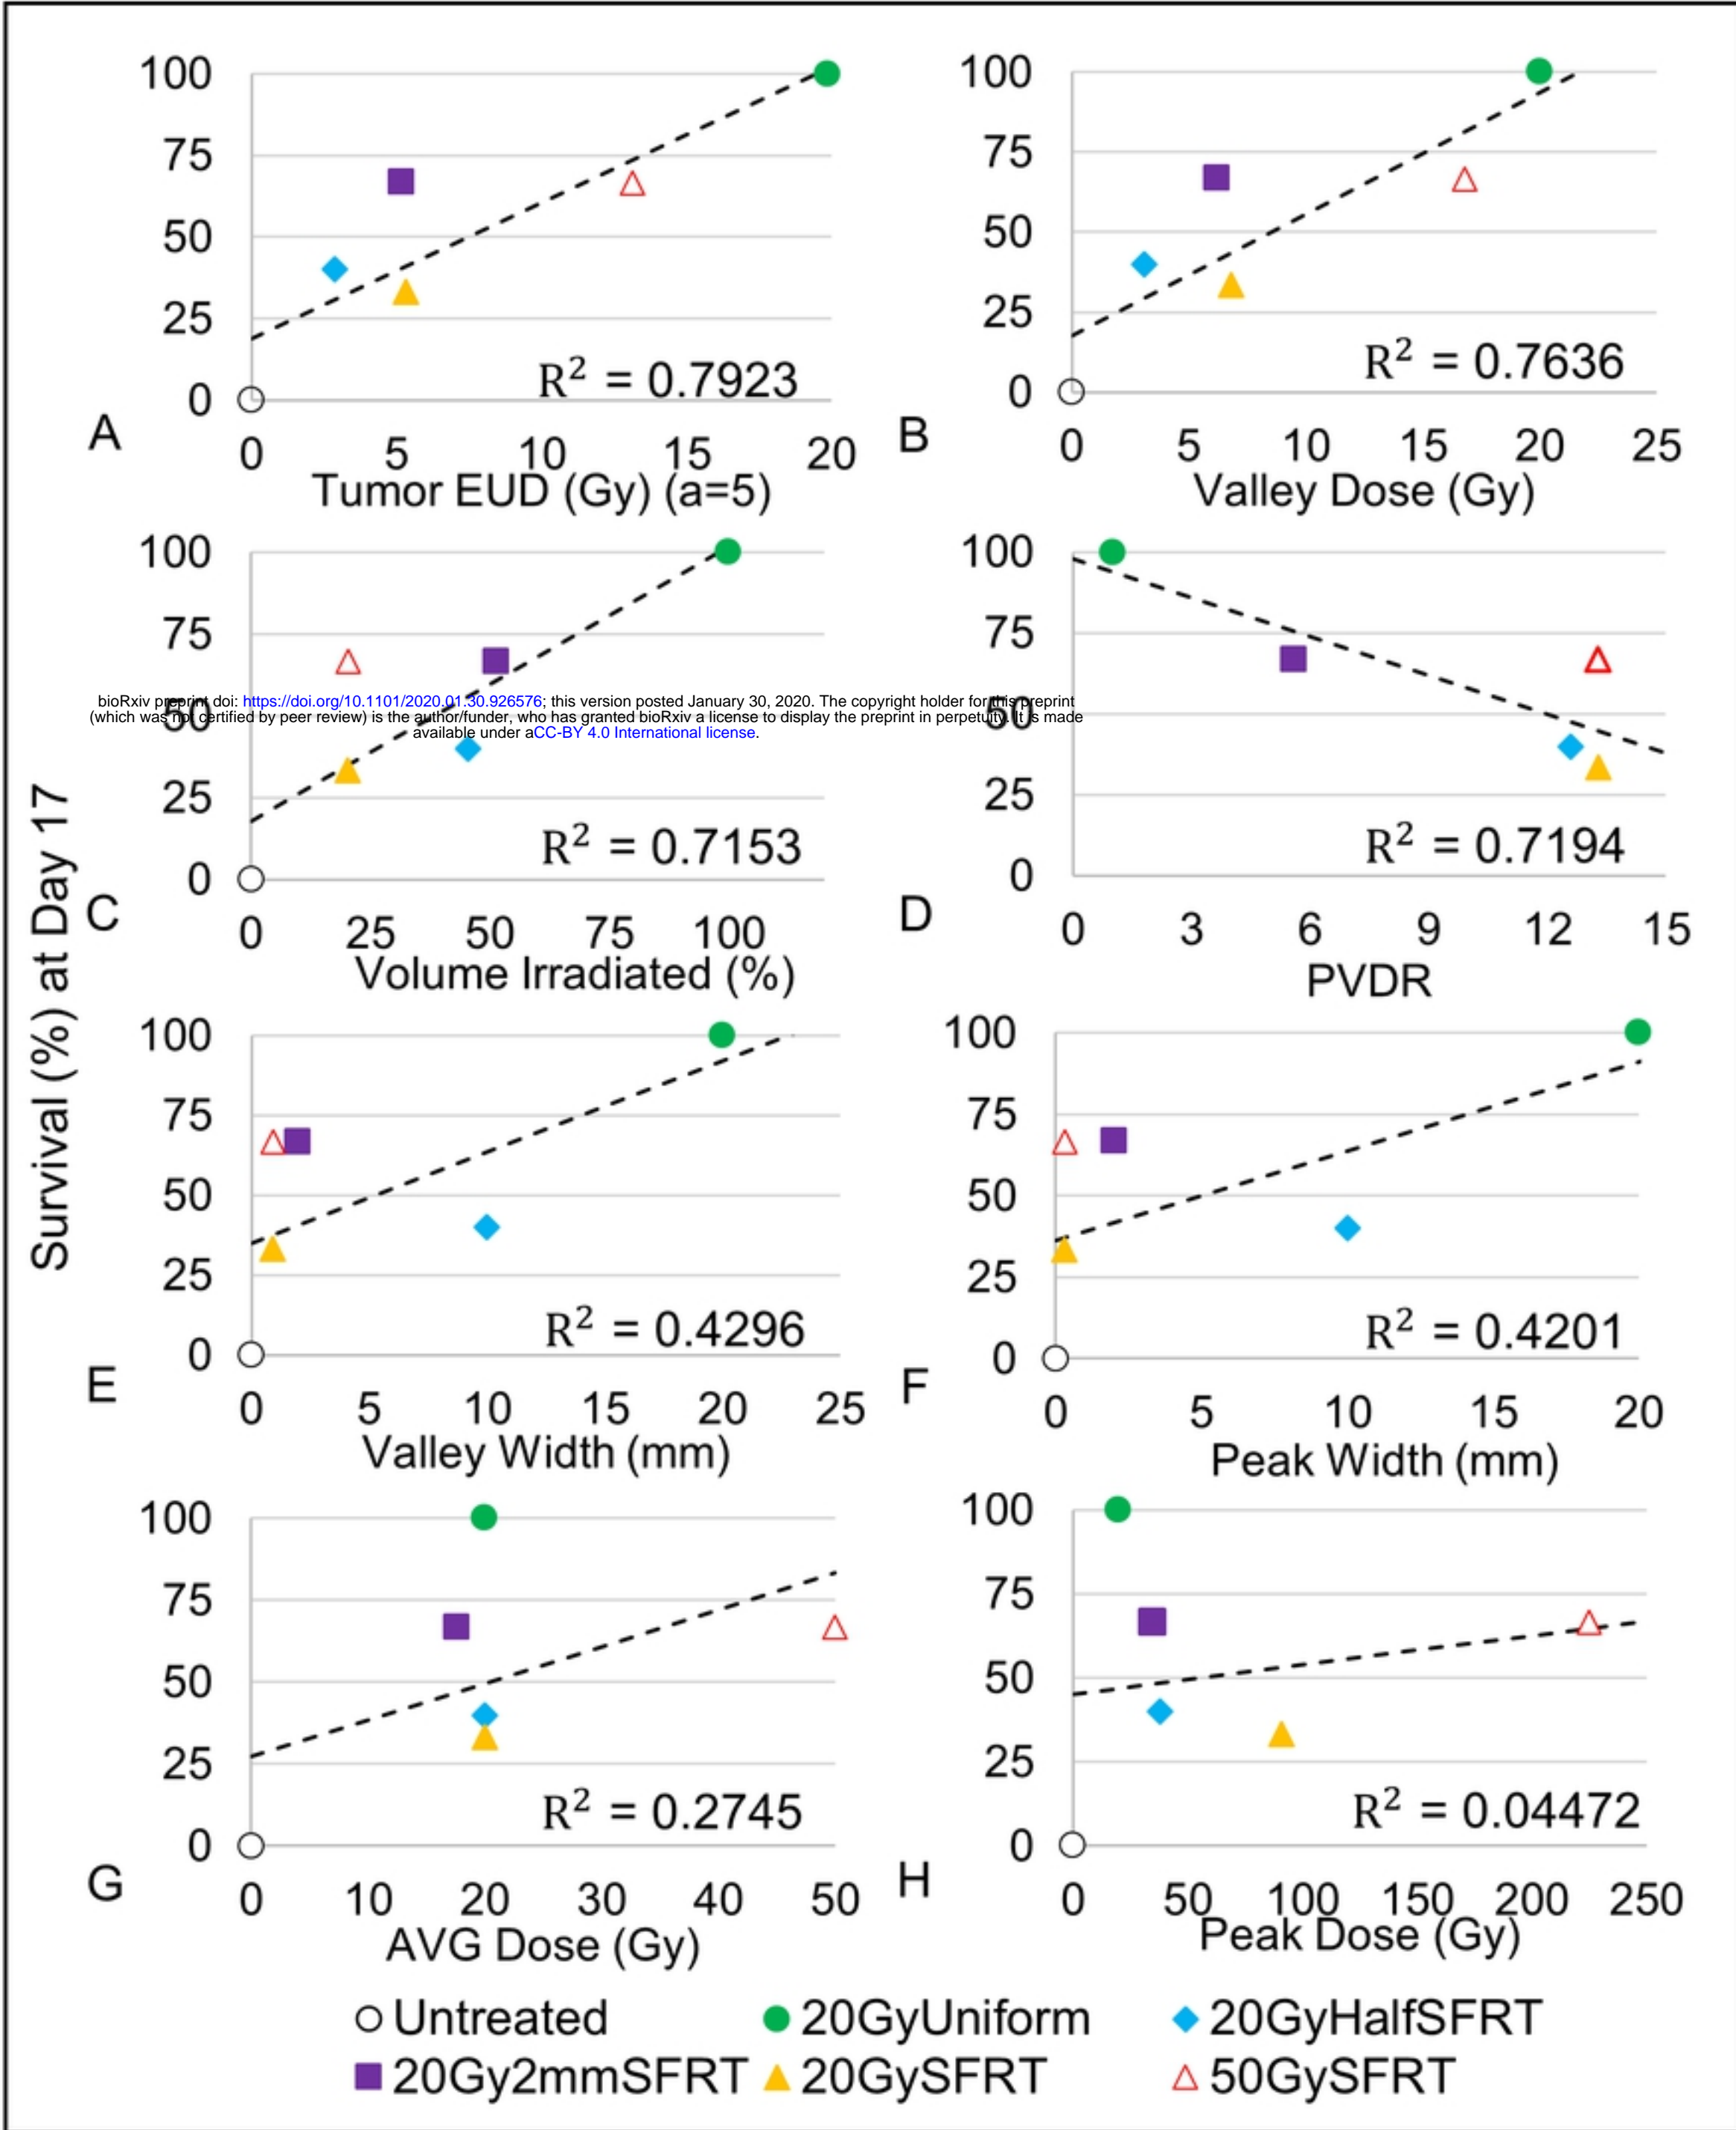

Figure 7

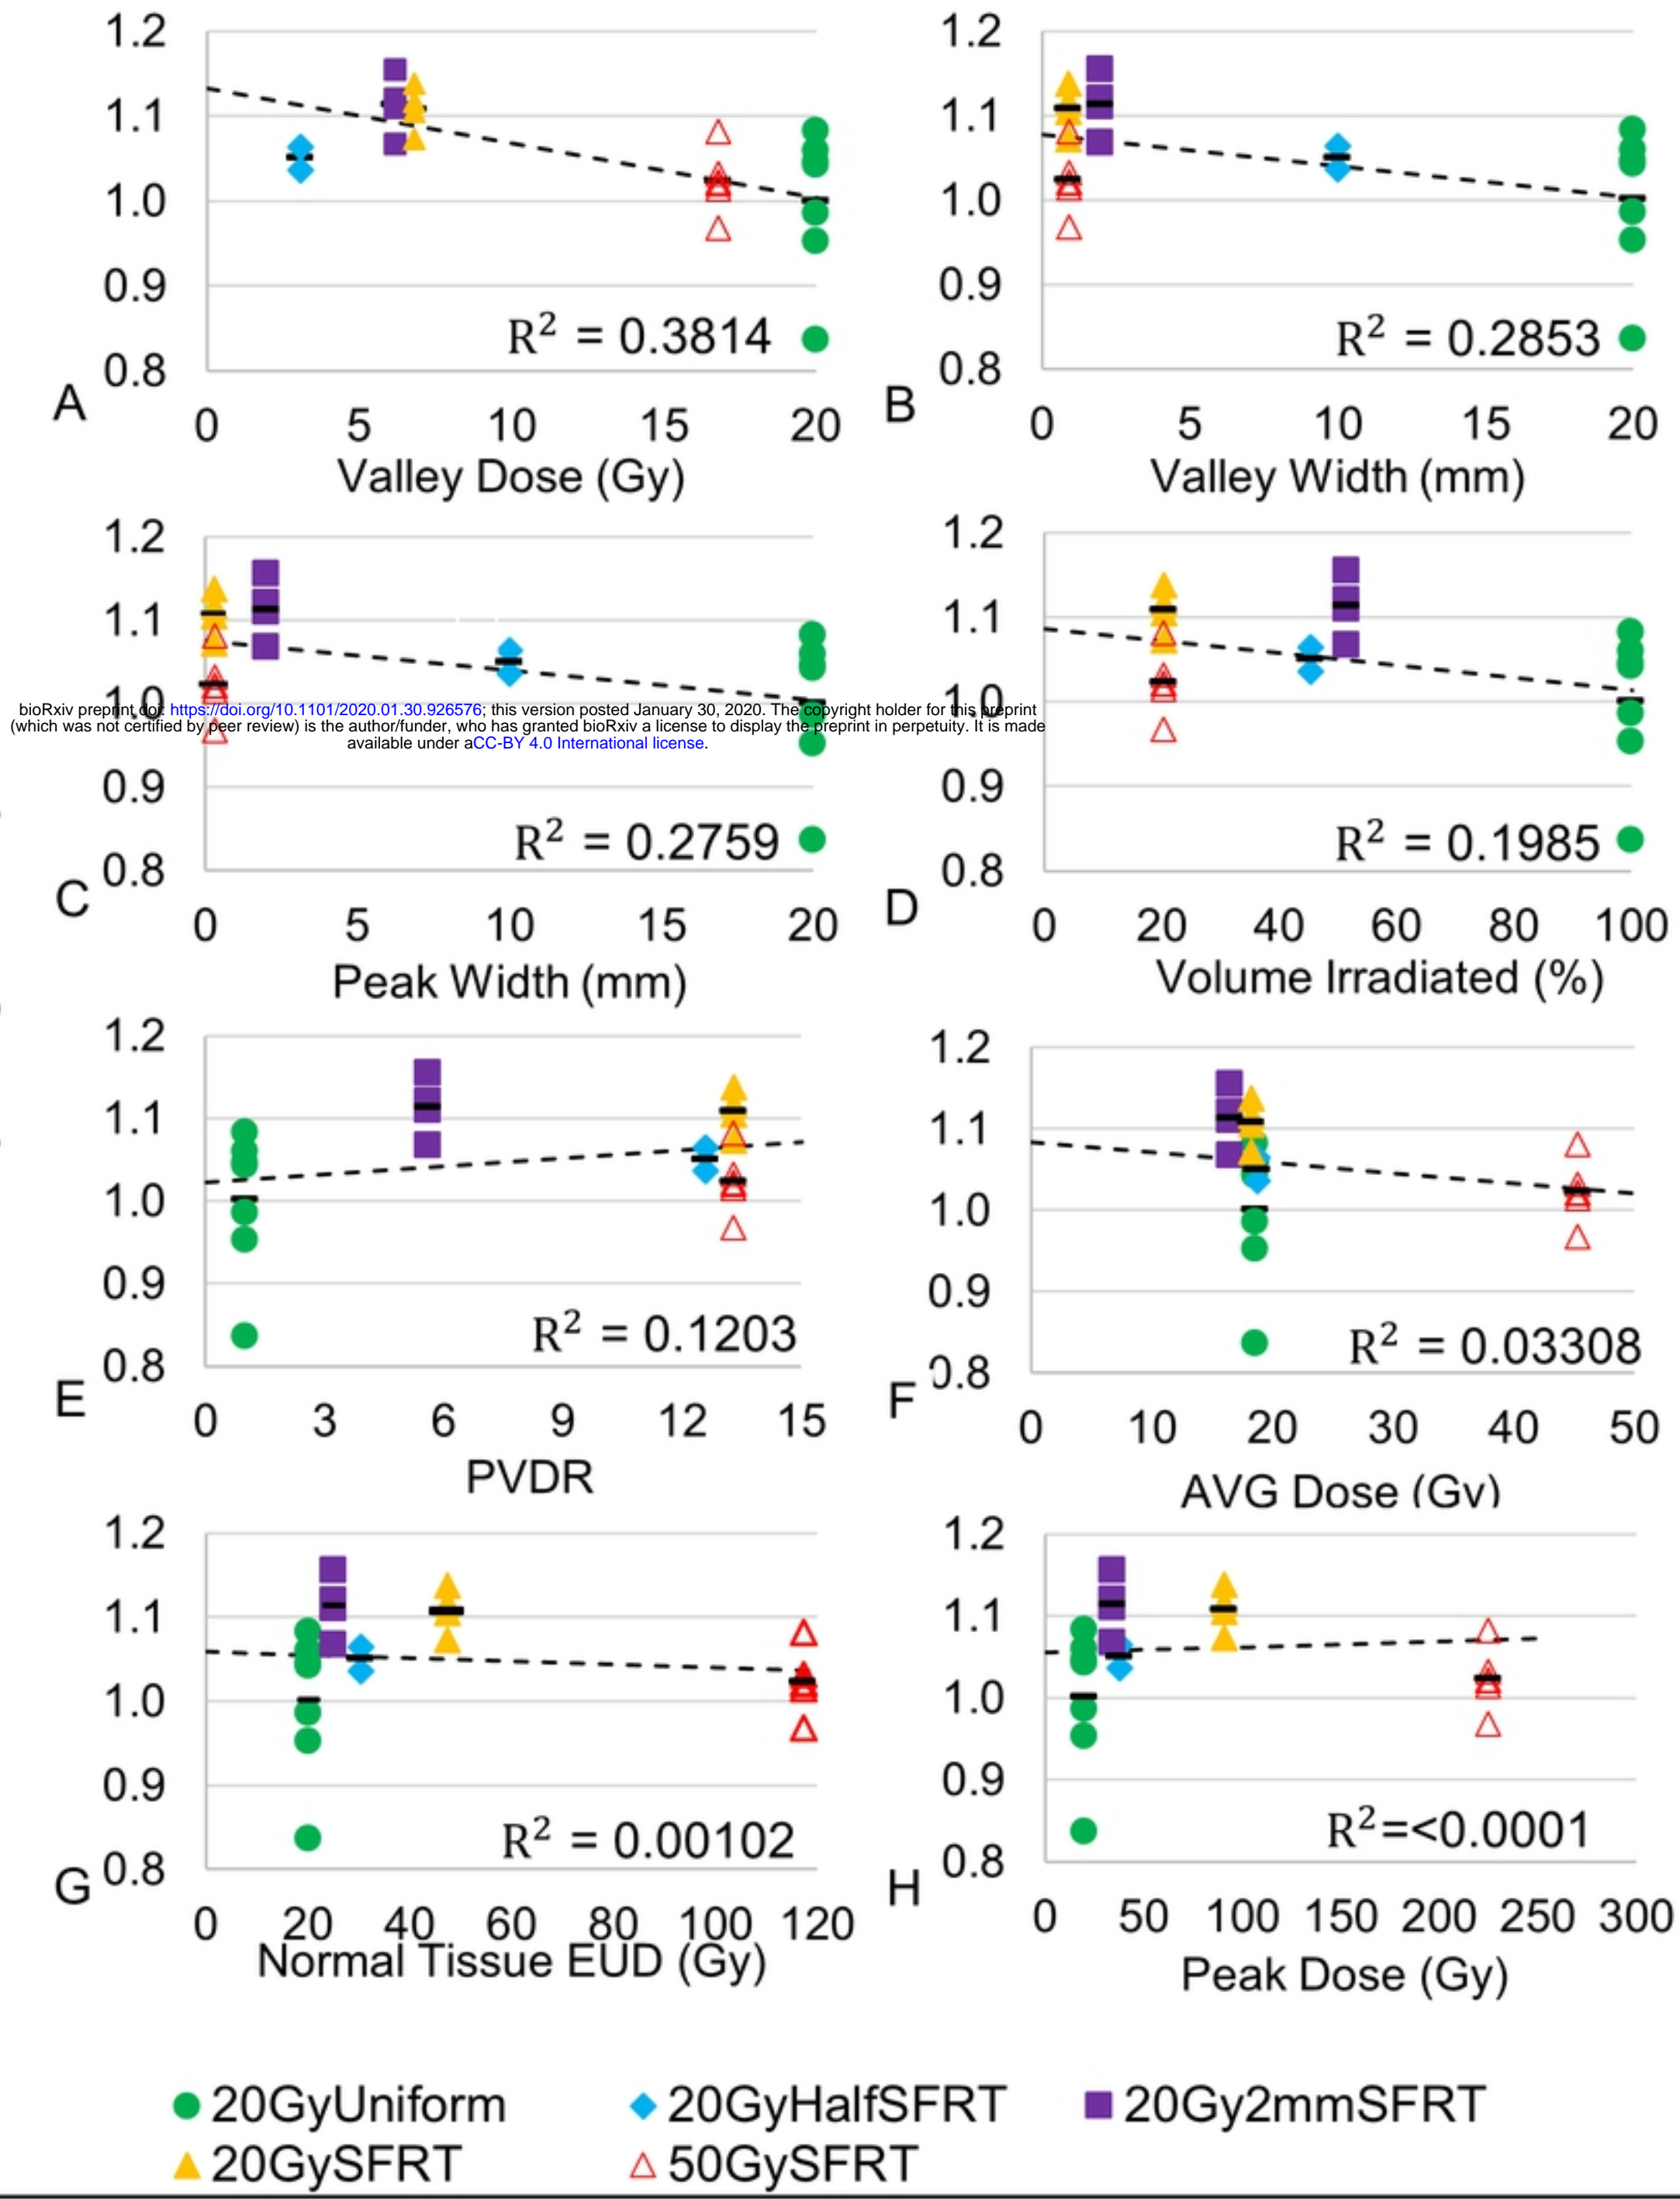

Source: https://www.biorxiv.org/content/10.1101/2020.01.30.926576v1.full.pdf
